# Supplementary material for: Temperature and isotope effects in the reaction of CH3CHOO with methanol
Source: Royal Society of Chemistry journal article supplement (doi:10.1039/c9cp02534k), 2019-01-01
Supplement: c9cp02534k1.pdf [file c9cp02534k1.pdf]

# Electronic Supplementary Information

## Temperature and Isotope Effects in the Reaction of CH<sub>3</sub>CHOO with Methanol

Wen Chao,<sup>a</sup> Yen-Hsiu Lin,<sup>a,b</sup> Cangtao Yin,<sup>a</sup> Wei-Hong Lin,<sup>a</sup> Kaito Takahashi,<sup>a\*</sup> and Jim Jr-Min Lin<sup>a,b\*</sup>

### Table of Contents

|                                                                                                                                   |     |
|-----------------------------------------------------------------------------------------------------------------------------------|-----|
| Summary of the experimental conditions for the reaction <i>syn</i> -CH <sub>3</sub> CHOO+2CH <sub>3</sub> OH (Table S1)           | S3  |
| Summary of the quadratic fit (Table S2-S4, Fig.S1)                                                                                | S5  |
| Summary of the experimental conditions for the reaction <i>anti</i> -CH <sub>3</sub> CHOO+CH <sub>3</sub> OH (Table S5)           | S8  |
| Error estimation                                                                                                                  | S9  |
| Kinetic analysis for the reaction <i>anti</i> -CH <sub>3</sub> CHOO+CH <sub>3</sub> OH (Fig. S2-S6)                               | S10 |
| Pressure dependence for the reactions of CH <sub>3</sub> OH with <i>anti</i> - and <i>syn</i> -CH <sub>3</sub> CHOO (Fig. S7, S8) | S14 |
| <i>k</i> <sub>obs</sub> of <i>syn</i> -CH <sub>3</sub> CHOO as a function of [CH <sub>3</sub> OD] (Fig. S9)                       | S16 |
| <i>k</i> <sub>obs</sub> of <i>syn</i> -CD <sub>3</sub> CDOO as a function of [CH <sub>3</sub> OH] (Fig. S10)                      | S16 |
| Synthesis of CD <sub>3</sub> CDI <sub>2</sub>                                                                                     | S17 |
| Details of the quantum chemistry calculation                                                                                      | S18 |
| The calculated transition state energies (Table S6)                                                                               | S19 |
| The tunneling correction factor (Table S7)                                                                                        | S19 |
| The effective decay rate coefficients for 1CH <sub>3</sub> OH and 2CH <sub>3</sub> OH channels (Fig. S12)                         | S19 |
| Geometries for the reaction CH <sub>3</sub> CHOO+1CH <sub>3</sub> OH (Fig. S13)                                                   | S20 |
| Estimation of the rotational and vibrational partition functions (Table S8, S9)                                                   | S21 |
| The calculated rate coefficients (Table S10)                                                                                      | S22 |
| Representative time traces for the <i>syn</i> -CH <sub>3</sub> CHOO + 2CH <sub>3</sub> OH experiments.                            | S27 |
| Representative time traces for the <i>syn</i> -CH <sub>3</sub> CHOO + 2CH <sub>3</sub> OD experiments.                            | S40 |
| Representative time traces for the <i>syn</i> -CD <sub>3</sub> CDOO + 2CH <sub>3</sub> OH experiments.                            | S43 |
| Representative time traces for the <i>anti</i> -CH <sub>3</sub> CHOO + CH <sub>3</sub> OH experiments.                            | S44 |
| Cartesian coordinates of the calculated geometries                                                                                | S51 |
| Reference                                                                                                                         | S57 |

## Notations for the reaction rate coefficients in this work

| rate coefficient | Reaction                                                        | Reaction order |
|------------------|-----------------------------------------------------------------|----------------|
| $k_{0s}$         | <i>syn</i> -CH <sub>3</sub> CHOO when [CH <sub>3</sub> OH] = 0  | 1              |
| $k_{1Hs}$        | <i>syn</i> -CH <sub>3</sub> CHOO+1CH <sub>3</sub> OH            | 2              |
| $k_{2Hs}$        | <i>syn</i> -CH <sub>3</sub> CHOO+2CH <sub>3</sub> OH            | 3              |
| $k_{1Ds}$        | <i>syn</i> -CH <sub>3</sub> CHOO+1CH <sub>3</sub> OD            | 2              |
| $k_{2Ds}$        | <i>syn</i> -CH <sub>3</sub> CHOO+2CH <sub>3</sub> OD            | 3              |
| $k_{0sd}$        | <i>syn</i> -CD <sub>3</sub> CDOO when [CH <sub>3</sub> OH] = 0  | 1              |
| $k_{1Hsd}$       | <i>syn</i> -CD <sub>3</sub> CDOO+1CH <sub>3</sub> OH            | 2              |
| $k_{2Hsd}$       | <i>syn</i> -CD <sub>3</sub> CDOO+2CH <sub>3</sub> OH            | 3              |
| $k_{0a}$         | <i>anti</i> -CH <sub>3</sub> CHOO when [CH <sub>3</sub> OH] = 0 | 1              |
| $k_{1Ha}$        | <i>anti</i> -CH <sub>3</sub> CHOO+1CH <sub>3</sub> OH           | 2              |

**Table S1.** Summary of the experimental conditions for the reaction *syn*-CH<sub>3</sub>CHOO+2CH<sub>3</sub>OH.

| Exp# | [CH <sub>3</sub> CHI <sub>2</sub> ]<br>/10 <sup>14</sup> cm <sup>-3</sup> | [CH <sub>3</sub> CHOO] <sub>0</sub><br>/10 <sup>11</sup> cm <sup>-3</sup> | <i>P</i> <sub>O<sub>2</sub></sub><br>/Torr | <i>P</i> <sub>total</sub><br>/Torr | <i>T</i><br>/K | <i>I</i> <sub>248 nm</sub><br>/mJ cm <sup>-2</sup> | Isotopologue       |
|------|---------------------------------------------------------------------------|---------------------------------------------------------------------------|--------------------------------------------|------------------------------------|----------------|----------------------------------------------------|--------------------|
| 1    | 2.06                                                                      | 3.41                                                                      | 11.3                                       | 250.2                              | 299.3          | 1.70                                               | CH <sub>3</sub> OH |
| 2    | 2.08                                                                      | 3.89                                                                      | 11.4                                       | 250.4                              | 303.6          | 1.81                                               | CH <sub>3</sub> OH |
| 3    | 1.95                                                                      | 3.84                                                                      | 11.4                                       | 250.2                              | 323.5          | 1.74                                               | CH <sub>3</sub> OH |
| 4    | 2.04                                                                      | 3.84                                                                      | 11.4                                       | 250.3                              | 303.7          | 1.81                                               | CH <sub>3</sub> OH |
| 5    | 1.97                                                                      | 4.25                                                                      | 11.3                                       | 249.6                              | 298.1          | 1.70                                               | CH <sub>3</sub> OH |
| 6    | 1.14                                                                      | 2.45                                                                      | 11.2                                       | 249.6                              | 297.9          | 1.80                                               | CH <sub>3</sub> OH |
| 7    | 2.33                                                                      | 5.03                                                                      | 11.2                                       | 249.6                              | 298.0          | 1.75                                               | CH <sub>3</sub> OH |
| 8    | 2.15                                                                      | 4.63                                                                      | 11.2                                       | 249.6                              | 298.0          | 1.72                                               | CH <sub>3</sub> OH |
| 9    | 2.30                                                                      | 4.28                                                                      | 11.7                                       | 249.9                              | 283.3          | 1.84                                               | CH <sub>3</sub> OH |
| 10   | 2.27                                                                      | 4.20                                                                      | 11.7                                       | 249.9                              | 293.5          | 1.80                                               | CH <sub>3</sub> OH |
| 11   | 2.26                                                                      | 4.04                                                                      | 11.7                                       | 249.9                              | 303.6          | 1.79                                               | CH <sub>3</sub> OH |
| 12   | 2.21                                                                      | 4.61                                                                      | 11.7                                       | 249.8                              | 283.1          | 1.76                                               | CH <sub>3</sub> OH |
| 13   | 2.22                                                                      | 4.24                                                                      | 11.5                                       | 250.0                              | 273.0          | 1.80                                               | CH <sub>3</sub> OH |
| 14   | 0.55                                                                      | 1.39                                                                      | 11.5                                       | 250.0                              | 273.0          | 1.81                                               | CH <sub>3</sub> OH |
| 15   | 1.12                                                                      | 2.37                                                                      | 11.5                                       | 249.9                              | 273.0          | 1.77                                               | CH <sub>3</sub> OH |
| 16   | 2.23                                                                      | 4.67                                                                      | 11.5                                       | 250.0                              | 273.0          | 1.79                                               | CH <sub>3</sub> OH |
| 17   | 0.48                                                                      | 2.07                                                                      | 11.5                                       | 250.0                              | 323.6          | 3.53                                               | CH <sub>3</sub> OH |
| 18   | 1.87                                                                      | 7.57                                                                      | 11.6                                       | 250.0                              | 323.6          | 3.51                                               | CH <sub>3</sub> OH |
| 19   | 0.95                                                                      | 3.87                                                                      | 11.6                                       | 250.0                              | 323.6          | 3.46                                               | CH <sub>3</sub> OH |
| 20   | 0.46                                                                      | 2.08                                                                      | 11.6                                       | 250.0                              | 323.5          | 3.45                                               | CH <sub>3</sub> OH |
| 21   | 1.08                                                                      | 2.50                                                                      | 12.3                                       | 50.5                               | 298.6          | 1.75                                               | CH <sub>3</sub> OH |
| 22   | 1.55                                                                      | 4.27                                                                      | 11                                         | 100.2                              | 298.6          | 1.80                                               | CH <sub>3</sub> OH |
| 23   | 1.51                                                                      | 3.21                                                                      | 10.9                                       | 249.8                              | 298.6          | 1.77                                               | CH <sub>3</sub> OH |
| 24   | 1.47                                                                      | 3.96                                                                      | 11.1                                       | 50.5                               | 298.5          | 1.81                                               | CH <sub>3</sub> OH |
| 25   | 1.98                                                                      | 4.14                                                                      | 11.4                                       | 250.1                              | 298.4          | 1.71                                               | CH <sub>3</sub> OH |
| 26   | 1.82                                                                      | 2.54                                                                      | 11.5                                       | 756.3                              | 298.5          | 1.67                                               | CH <sub>3</sub> OH |
| 27   | 1.84                                                                      | 3.19                                                                      | 11.3                                       | 499.3                              | 298.5          | 1.53                                               | CH <sub>3</sub> OH |
| 28   | 2.58                                                                      | 5.67                                                                      | 14                                         | 30.3                               | 298.6          | 1.86                                               | CH <sub>3</sub> OH |
| 29   | 1.94                                                                      | 5.04                                                                      | 11.6                                       | 100.3                              | 298.6          | 1.86                                               | CH <sub>3</sub> OH |
| 30   | 1.93                                                                      | 4.02                                                                      | 11.3                                       | 250.0                              | 298.6          | 1.81                                               | CH <sub>3</sub> OH |
| 31   | 1.76                                                                      | 4.07                                                                      | 11.3                                       | 250.0                              | 323.7          | 1.83                                               | CH <sub>3</sub> OH |
| 32   | 1.86                                                                      | 5.42                                                                      | 12.4                                       | 30.4                               | 323.6          | 1.89                                               | CH <sub>3</sub> OH |
| 33   | 1.80                                                                      | 4.76                                                                      | 11.7                                       | 100.4                              | 323.5          | 1.76                                               | CH <sub>3</sub> OH |
| 34   | 0.82                                                                      | 4.19                                                                      | 11.2                                       | 250.2                              | 313.6          | 3.56                                               | CH <sub>3</sub> OH |

|                 |                   |                   |      |       |       |      |                    |
|-----------------|-------------------|-------------------|------|-------|-------|------|--------------------|
| 35              | 0.42              | 2.23              | 11.2 | 250.3 | 313.6 | 3.50 | CH <sub>3</sub> OH |
| 36              | 1.65              | 7.46              | 11.2 | 250.3 | 313.6 | 3.42 | CH <sub>3</sub> OH |
| 37              | 0.40              | 2.04              | 11.2 | 250.3 | 323.6 | 3.41 | CH <sub>3</sub> OH |
| 38              | 1.60              | 7.74              | 11.2 | 250.3 | 323.6 | 3.37 | CH <sub>3</sub> OH |
| 39              | 0.79              | 4.14              | 11.2 | 250.3 | 323.6 | 3.41 | CH <sub>3</sub> OH |
| 40              | 1.73              | 4.30              | 11.0 | 250.2 | 323.6 | 1.81 | CH <sub>3</sub> OD |
| 41              | 1.75              | 4.27              | 11.0 | 250.0 | 313.4 | 1.76 | CH <sub>3</sub> OD |
| 42              | 1.68              | 3.79              | 10.9 | 250.2 | 313.3 | 1.58 | CH <sub>3</sub> OD |
| 43              | 1.93              | 4.12              | 10.9 | 250.2 | 293.2 | 1.83 | CH <sub>3</sub> OD |
| 44              | 2.05              | 4.21              | 10.9 | 250.1 | 273.0 | 1.82 | CH <sub>3</sub> OD |
| 45              | 1.95              | 4.58              | 10.9 | 250.1 | 283.1 | 1.79 | CH <sub>3</sub> OD |
| 46              | 1.77              | 4.28              | 10.9 | 250.1 | 303.3 | 1.82 | CH <sub>3</sub> OD |
| 47 <sup>a</sup> | 0.71 <sup>b</sup> | 2.84 <sup>b</sup> | 10.9 | 250.2 | 323.7 | 2.68 | CH <sub>3</sub> OH |
| 48 <sup>a</sup> | 0.74 <sup>b</sup> | 2.22 <sup>b</sup> | 10.9 | 250.2 | 298.6 | 2.69 | CH <sub>3</sub> OH |

<sup>a</sup> The reaction *syn*-CD<sub>3</sub>CDOO+2CH<sub>3</sub>OH.

<sup>b</sup> By assuming the same UV absorption cross section as the normal isotopologues ( $\sigma_{\text{CH}_3\text{CHI}_2} = 3.61 \times 10^{-18} \text{ cm}^{-2}$  at 296 nm;<sup>1</sup>  $\sigma_{\text{syn-CH}_3\text{CHOO}} = 1.19 \times 10^{-17} \text{ cm}^{-2}$  at 340 nm<sup>2</sup>).

**Table S2.** Summary of the quadratic fit with and without the first order term for *syn*-CH<sub>3</sub>CHOO reaction with CH<sub>3</sub>OH vapor. The negative values and the values that are smaller than their fitting error are marked in red.

| Exp # | $P_{\text{total}}$<br>/Torr | $T$<br>/K | with $k_{1\text{Hs}}$ term          |                                                                        |                                                                        | without $k_{1\text{Hs}}$ term       |                                                                        | [CH <sub>3</sub> OH]<br>/10 <sup>16</sup> cm <sup>-3</sup> |
|-------|-----------------------------|-----------|-------------------------------------|------------------------------------------------------------------------|------------------------------------------------------------------------|-------------------------------------|------------------------------------------------------------------------|------------------------------------------------------------|
|       |                             |           | $k_{0\text{s}}$<br>/s <sup>-1</sup> | $k_{1\text{Hs}}$<br>/10 <sup>-16</sup> cm <sup>3</sup> s <sup>-1</sup> | $k_{2\text{Hs}}$<br>/10 <sup>-32</sup> cm <sup>6</sup> s <sup>-1</sup> | $k_{0\text{s}}$<br>/s <sup>-1</sup> | $k_{2\text{Hs}}$<br>/10 <sup>-32</sup> cm <sup>6</sup> s <sup>-1</sup> |                                                            |
| 1     | 250.2                       | 299.3     | 363.6 ± 43.6 <sup>a</sup>           | 6.3 ± 11.2                                                             | 7.2 ± 0.4                                                              | 384.4 ± 22.1                        | 7.4 ± 0.1                                                              | 1.7 - 33.8                                                 |
| 2     | 250.4                       | 303.6     | 450.5 ± 18.6                        | 8.8 ± 4.7                                                              | 5.1 ± 0.2                                                              | 483.3 ± 7.3                         | 5.5 ± 0.0                                                              | 2.5 - 22.2                                                 |
| 3     | 250.2                       | 323.5     | 875.4 ± 22.8                        | 19.9 ± 4.7                                                             | 0.8 ± 0.2                                                              | 961.1 ± 15.7                        | 1.5 ± 0.1                                                              | 2.4 - 28.0                                                 |
| 4     | 250.3                       | 303.7     | 433.1 ± 22.7                        | 11.6 ± 5.8                                                             | 4.8 ± 0.2                                                              | 471.8 ± 12.6                        | 5.2 ± 0.1                                                              | 1.6 - 29.6                                                 |
| 5     | 249.6                       | 298.1     | 409.7 ± 47.9                        | 0.7 ± 12.7                                                             | 8.4 ± 0.5                                                              | 411.9 ± 23.2                        | 8.4 ± 0.1                                                              | 1.7 - 30.7                                                 |
| 6     | 249.6                       | 297.9     | 300.9 ± 60.2                        | 25.1 ± 16.4                                                            | 7.1 ± 0.6                                                              | 381.1 ± 30.9                        | 8.0 ± 0.2                                                              | 1.7 - 30.5                                                 |
| 7     | 249.6                       | 298.0     | 379.8 ± 31.0                        | 23.6 ± 8.1                                                             | 7.0 ± 0.3                                                              | 458.0 ± 18.3                        | 7.9 ± 0.1                                                              | 1.7 - 30.6                                                 |
| 8     | 249.6                       | 298.0     | 376.9 ± 27.0                        | 12.4 ± 7.2                                                             | 7.3 ± 0.3                                                              | 417.4 ± 14.2                        | 7.8 ± 0.1                                                              | 1.7 - 30.4                                                 |
| 9     | 249.9                       | 283.3     | 259.6 ± 45.9                        | 17.9 ± 18.6                                                            | 24.9 ± 1.2                                                             | 299.7 ± 19.2                        | 26.1 ± 0.4                                                             | 1.4 - 17.5                                                 |
| 10    | 249.9                       | 293.5     | 356.7 ± 47.0                        | 3.9 ± 13.4                                                             | 11.0 ± 0.6                                                             | 368.7 ± 21.7                        | 11.2 ± 0.2                                                             | 1.8 - 27.6                                                 |
| 11    | 249.9                       | 303.6     | 466.6 ± 23.9                        | 2.9 ± 5.9                                                              | 5.3 ± 0.2                                                              | 476.7 ± 11.8                        | 5.4 ± 0.1                                                              | 1.7 - 30.6                                                 |
| 12    | 249.8                       | 283.1     | 177.6 ± 47.8                        | 60.2 ± 19.4                                                            | 21.2 ± 1.2                                                             | 312.2 ± 24.6                        | 24.9 ± 0.4                                                             | 1.5 - 17.5                                                 |
| 13    | 250.0                       | 273.0     | 192.4 ± 76.8                        | 59.0 ± 40.4                                                            | 55.5 ± 4                                                               | 296.1 ± 30.8                        | 61.1 ± 1.1                                                             | 1.4 - 10.4                                                 |
| 14    | 250.0                       | 273.0     | -96.8 ± 221.9                       | 167.3 ± 149                                                            | 45.9 ± 19.7                                                            | 140.1 ± 69.6                        | 67.4 ± 4.7                                                             | 1.5 - 7.2                                                  |
| 15    | 249.9                       | 273.0     | 77.5 ± 203.3                        | 70.1 ± 108.7                                                           | 54.0 ± 10.7                                                            | 198.7 ± 75.5                        | 60.7 ± 2.8                                                             | 1.5 - 10.6                                                 |
| 16    | 250.0                       | 273.0     | 374.9 ± 63.6                        | -59.3 ± 32.7                                                           | 71.0 ± 3.2                                                             | 268.1 ± 26.1                        | 65.4 ± 0.9                                                             | 1.5 - 10.5                                                 |
| 17    | 250.0                       | 323.6     | 990.0 ± 40.9                        | 1.1 ± 7.3                                                              | 1.4 ± 0.2                                                              | 995.2 ± 19.5                        | 1.4 ± 0.1                                                              | 2.2 - 30.9                                                 |
| 18    | 250.0                       | 323.6     | 1011.9 ± 14.5                       | 12.0 ± 2.6                                                             | 1.1 ± 0.1                                                              | 1070.7 ± 10.9                       | 1.4 ± 0.0                                                              | 2.2 - 31.6                                                 |
| 19    | 250.0                       | 323.6     | 973.1 ± 14.1                        | 4.1 ± 2.5                                                              | 1.3 ± 0.1                                                              | 993.5 ± 7.3                         | 1.4 ± 0.0                                                              | 2.2 - 31.8                                                 |
| 20    | 250.0                       | 323.5     | 955.5 ± 44.5                        | -3.7 ± 7.8                                                             | 1.6 ± 0.3                                                              | 937.1 ± 21.3                        | 1.4 ± 0.1                                                              | 2.2 - 31.6                                                 |
| 21    | 50.5                        | 298.6     | 308.4 ± 29.1                        | 7.6 ± 7.4                                                              | 6.0 ± 0.3                                                              | 334.9 ± 13.8                        | 6.3 ± 0.1                                                              | 1.6 - 21.1                                                 |
| 22    | 100.2                       | 298.6     | 341.5 ± 66.3                        | 15.8 ± 16.2                                                            | 6.4 ± 0.7                                                              | 398.1 ± 31.6                        | 7.0 ± 0.2                                                              | 1.7 - 22.0                                                 |
| 23    | 249.8                       | 298.6     | 366.9 ± 9.2                         | 6.7 ± 2.9                                                              | 7.6 ± 0.1                                                              | 385.9 ± 4.7                         | 8.0 ± 0.1                                                              | 1.6 - 21.7                                                 |
| 24    | 50.5                        | 298.5     | 379.5 ± 30.5                        | -5.3 ± 7.6                                                             | 6.7 ± 0.3                                                              | 360.6 ± 13.9                        | 6.5 ± 0.1                                                              | 1.7 - 21.3                                                 |
| 25    | 250.1                       | 298.4     | 416.5 ± 42.5                        | -0.4 ± 10.3                                                            | 8.0 ± 0.5                                                              | 415.1 ± 18.2                        | 8.0 ± 0.1                                                              | 2.5 - 23.6                                                 |
| 26    | 756.3                       | 298.5     | 232.2 ± 101.3                       | 44.8 ± 17.3                                                            | 6.5 ± 0.6                                                              | 467.5 ± 54.7                        | 8.0 ± 0.2                                                              | 2.7 - 25.5                                                 |
| 27    | 499.3                       | 298.5     | 321.7 ± 64.0                        | 19.8 ± 11.2                                                            | 7.4 ± 0.4                                                              | 422.8 ± 30.7                        | 8.1 ± 0.1                                                              | 2.6 - 24.8                                                 |
| 28    | 30.3                        | 298.6     | 376.6 ± 106.8                       | 13.8 ± 14.2                                                            | 4.2 ± 0.4                                                              | 464.5 ± 57.5                        | 4.6 ± 0.1                                                              | 2.3 - 35.8                                                 |
| 29    | 100.3                       | 298.6     | 408.8 ± 27.9                        | 4.5 ± 5.9                                                              | 7.2 ± 0.2                                                              | 427.5 ± 12.8                        | 7.4 ± 0.1                                                              | 1.6 - 22.4                                                 |
| 30    | 250.0                       | 298.6     | 392.0 ± 20.3                        | 6.6 ± 5.5                                                              | 7.6 ± 0.3                                                              | 414.0 ± 8.5                         | 7.9 ± 0.1                                                              | 2.5 - 20.1                                                 |
| 31    | 250.0                       | 323.7     | 926.9 ± 27.4                        | 18.5 ± 4.5                                                             | 0.9 ± 0.1                                                              | 1025.4 ± 22.6                       | 1.4 ± 0.1                                                              | 3.2 - 30.9                                                 |

|    |       |       |                   |                |               |                   |               |            |
|----|-------|-------|-------------------|----------------|---------------|-------------------|---------------|------------|
| 32 | 30.4  | 323.6 | $788.2 \pm 36.0$  | $12.4 \pm 4.3$ | $0.7 \pm 0.1$ | $874.2 \pm 27.6$  | $1.0 \pm 0.0$ | 2.3 - 37.9 |
| 33 | 100.4 | 323.5 | $884.4 \pm 21.3$  | $11.8 \pm 3.1$ | $1.0 \pm 0.1$ | $955.3 \pm 16.7$  | $1.4 \pm 0.0$ | 3.1 - 29.6 |
| 34 | 250.2 | 313.6 | $676.5 \pm 17.6$  | $3.1 \pm 3.1$  | $2.5 \pm 0.1$ | $691.9 \pm 8.2$   | $2.6 \pm 0.0$ | 3.0 - 30.1 |
| 35 | 250.3 | 313.6 | $703.8 \pm 26.5$  | $-7.8 \pm 4.7$ | $2.9 \pm 0.2$ | $664.3 \pm 13.4$  | $2.7 \pm 0.0$ | 3.0 - 30.2 |
| 36 | 250.3 | 313.6 | $776.3 \pm 16.5$  | $9.0 \pm 2.9$  | $2.4 \pm 0.1$ | $821.8 \pm 10.6$  | $2.6 \pm 0.0$ | 3.0 - 30.2 |
| 37 | 250.3 | 323.6 | $985.1 \pm 29.6$  | $1.8 \pm 5.0$  | $1.4 \pm 0.2$ | $994.8 \pm 13.3$  | $1.4 \pm 0.0$ | 2.9 - 29.3 |
| 38 | 250.3 | 323.6 | $1077.9 \pm 19.8$ | $8 \pm 3.3$    | $1.1 \pm 0.1$ | $1120.4 \pm 11.4$ | $1.4 \pm 0.0$ | 2.9 - 29.3 |
| 39 | 250.3 | 323.6 | $933.1 \pm 34.0$  | $14.9 \pm 5.7$ | $1.0 \pm 0.2$ | $1011.0 \pm 20.0$ | $1.4 \pm 0.1$ | 2.9 - 29.3 |

<sup>a</sup>  $\pm 1\sigma$  of the fitting error.

**Table S3.** Summary of the quadratic fit with and without the first order term for *syn*-CH<sub>3</sub>CHOO reaction with CH<sub>3</sub>OD vapor. The negative values and the values that are smaller than their fitting error are marked in red.

| Exp # | $P_{\text{total}}$<br>/Torr | $T$<br>/K | with $k_{1\text{Ds}}$ term          |                                                                        |                                                                        | without $k_{1\text{Ds}}$ term       |                                                                        | [CH <sub>3</sub> OD]<br>/10 <sup>16</sup> cm <sup>-3</sup> |
|-------|-----------------------------|-----------|-------------------------------------|------------------------------------------------------------------------|------------------------------------------------------------------------|-------------------------------------|------------------------------------------------------------------------|------------------------------------------------------------|
|       |                             |           | $k_{0\text{s}}$<br>/s <sup>-1</sup> | $k_{1\text{Ds}}$<br>/10 <sup>-16</sup> cm <sup>3</sup> s <sup>-1</sup> | $k_{2\text{Ds}}$<br>/10 <sup>-32</sup> cm <sup>6</sup> s <sup>-1</sup> | $k_{0\text{s}}$<br>/s <sup>-1</sup> | $k_{2\text{Ds}}$<br>/10 <sup>-32</sup> cm <sup>6</sup> s <sup>-1</sup> |                                                            |
| 40    | 250.2                       | 323.6     | $935.7 \pm 28.5$ <sup>a</sup>       | $12.5 \pm 5.3$                                                         | $0.2 \pm 0.2$                                                          | $994.1 \pm 17.7$                    | $0.7 \pm 0.0$                                                          | 2.6 - 26.3                                                 |
| 41    | 250.0                       | 313.4     | $670.1 \pm 17.3$                    | $3.3 \pm 3.4$                                                          | $0.9 \pm 0.1$                                                          | $684.4 \pm 8.7$                     | $1.0 \pm 0.0$                                                          | 2.2 - 27.1                                                 |
| 42    | 250.2                       | 313.3     | $622.2 \pm 15.5$                    | $4.3 \pm 3.1$                                                          | $1.0 \pm 0.1$                                                          | $641.5 \pm 7.5$                     | $1.1 \pm 0.0$                                                          | 2.2 - 26.3                                                 |
| 43    | 250.2                       | 293.2     | $376.7 \pm 38.6$                    | $-0.2 \pm 7.6$                                                         | $4.7 \pm 0.3$                                                          | $375.8 \pm 15.8$                    | $4.7 \pm 0.1$                                                          | 2.5 - 25.6                                                 |
| 44    | 250.1                       | 273.0     | $379.2 \pm 120.3$                   | $-42.6 \pm 36.3$                                                       | $29.2 \pm 2.4$                                                         | $244.8 \pm 36.8$                    | $26.4 \pm 0.4$                                                         | 2.7 - 12.3                                                 |
| 45    | 250.1                       | 283.1     | $266.8 \pm 87.9$                    | $9.8 \pm 21.2$                                                         | $10.2 \pm 1$                                                           | $304.4 \pm 32.7$                    | $10.7 \pm 0.2$                                                         | 2.5 - 17.8                                                 |
| 46    | 250.1                       | 303.3     | $478.3 \pm 22.5$                    | $1.8 \pm 4.0$                                                          | $2.1 \pm 0.1$                                                          | $487.4 \pm 9.2$                     | $2.1 \pm 0.0$                                                          | 2.4 - 27.6                                                 |

<sup>a</sup>  $\pm 1\sigma$  of the fitting error.

**Table S4.** Summary of the quadratic fit with and without the first order term for *syn*-CD<sub>3</sub>CDOO reaction with CH<sub>3</sub>OH vapor. The negative values and the values that are smaller than their fitting error are marked in red.

| Exp # | $P_{\text{total}}$<br>/Torr | $T$<br>/K | with $k_{1\text{Hsd}}$ term          |                                                                         |                                                                         | without $k_{1\text{Hsd}}$ term       |                                                                         | [CH <sub>3</sub> OH]<br>/10 <sup>16</sup> cm <sup>-3</sup> |
|-------|-----------------------------|-----------|--------------------------------------|-------------------------------------------------------------------------|-------------------------------------------------------------------------|--------------------------------------|-------------------------------------------------------------------------|------------------------------------------------------------|
|       |                             |           | $k_{0\text{sd}}$<br>/s <sup>-1</sup> | $k_{1\text{Hsd}}$<br>/10 <sup>-16</sup> cm <sup>3</sup> s <sup>-1</sup> | $k_{2\text{Hsd}}$<br>/10 <sup>-32</sup> cm <sup>6</sup> s <sup>-1</sup> | $k_{0\text{sd}}$<br>/s <sup>-1</sup> | $k_{2\text{Hsd}}$<br>/10 <sup>-32</sup> cm <sup>6</sup> s <sup>-1</sup> |                                                            |
| 47    | 250.2                       | 323.7     | 381.8 ± 12.0 <sup>a</sup>            | 0.8 ± 2.7                                                               | 1.7 ± 0.1                                                               | 385.1 ± 5.1                          | 1.7 ± 0.0                                                               | 2.2 - 27.4                                                 |
| 48    | 250.2                       | 298.6     | 184.6 ± 41.3                         | 8.5 ± 12.2                                                              | 9.1 ± 0.6                                                               | 210.8 ± 16.9                         | 9.5 ± 0.2                                                               | 2.4 - 20.1                                                 |

<sup>a</sup> ± 1σ of the fitting error.

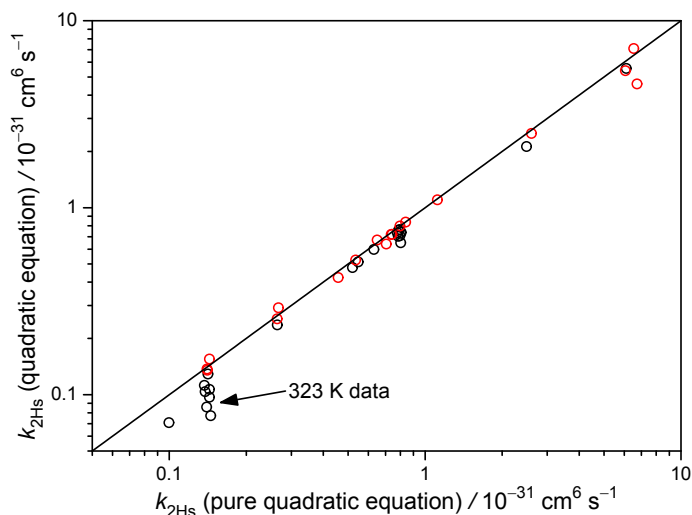

**Fig. S1.** Comparison between the  $k_{2\text{Hs}}$  values obtained from the quadratic fit with and without considering the first order term. The cases of which the  $k_{1\text{Hs}}$  value is negative or smaller than its fitting error are marked as red circles. The deviation from the one-to-one line is larger at 323 K because the quadratic feature is less clear at high temperature.

**Table S5.** Summary of the experimental conditions for the reaction *anti*-CH<sub>3</sub>CHOO+CH<sub>3</sub>OH.

| Exp # | [CH <sub>3</sub> CHI <sub>2</sub> ] | <i>P</i> <sub>O<sub>2</sub></sub> | <i>P</i> <sub>total</sub> | <i>T</i> | <i>I</i> <sub>248 nm</sub> | <i>k</i> <sub>0a</sub>     | <i>k</i> <sub>1Ha</sub>                            |
|-------|-------------------------------------|-----------------------------------|---------------------------|----------|----------------------------|----------------------------|----------------------------------------------------|
|       | /10 <sup>14</sup> cm <sup>-3</sup>  | /Torr                             | /Torr                     | /K       | /mJ cm <sup>-2</sup>       | /s <sup>-1</sup>           | /10 <sup>-12</sup> cm <sup>3</sup> s <sup>-1</sup> |
| 49    | 2.05 <sup>a</sup>                   | 11.3                              | 100.4                     | 297.8    | 2.01                       | 1062.6 ± 51.0 <sup>b</sup> | 4.1 ± 0.0 <sup>b</sup>                             |
| 50    | 1.95                                | 11.2                              | 100.6                     | 297.4    | 1.67                       | 979.6 ± 138.2              | 4.1 ± 0.1                                          |
| 51    | 2.20                                | 11.8                              | 100.5                     | 298.3    | 1.91                       | 965.6 ± 138.8              | 3.8 ± 0.1                                          |
| 52    | 2.28                                | 11.8                              | 100.3                     | 298.2    | 1.48                       | 1147.4 ± 129.0             | 4.0 ± 0.1                                          |
| 53    | 2.14                                | 11.4                              | 100.5                     | 298.1    | 1.48                       | 965.9 ± 151.9              | 4.0 ± 0.1                                          |
| 54    | 2.23                                | 11.7                              | 100.2                     | 298.1    | 1.68                       | 1123.9 ± 77.2              | 4.1 ± 0.1                                          |
| 55    | 2.09                                | 11.7                              | 100.4                     | 297.5    | 1.53                       | 1102.2 ± 129.7             | 4.1 ± 0.1                                          |
| 56    | 2.05                                | 11.4                              | 250.7                     | 297.9    | 1.91                       | 1218.6 ± 179.8             | 4.7 ± 0.1                                          |
| 57    | 2.01                                | 11.2                              | 250.6                     | 298.3    | 1.48                       | 1020.4 ± 263.0             | 4.8 ± 0.2                                          |
| 58    | 2.19                                | 11.4                              | 250.7                     | 298.0    | 1.68                       | 970.3 ± 103.2              | 5.0 ± 0.1                                          |
| 59    | 2.10                                | 11.3                              | 250.6                     | 298.1    | 1.68                       | 872.5 ± 105.8              | 5.1 ± 0.1                                          |
| 60    | 2.06                                | 11.4                              | 250.6                     | 298.2    | 1.68                       | 861.7 ± 95.3               | 4.9 ± 0.1                                          |
| 61    | 2.16                                | 11.3                              | 250.8                     | 298.1    | 1.76                       | 955.0 ± 103.4              | 4.6 ± 0.1                                          |
| 62    | 1.59                                | 11.4                              | 250.7                     | 298.1    | 1.79                       | 622.0 ± 220.5              | 5.3 ± 0.2                                          |
| 63    | 2.01                                | 11.3                              | 501.4                     | 297.4    | 1.53                       | 777.8 ± 133.1              | 5.6 ± 0.1                                          |
| 64    | 2.00                                | 11.3                              | 501.4                     | 297.4    | 1.53                       | 703.8 ± 81.3               | 5.8 ± 0.1                                          |
| 65    | 2.14                                | 11.4                              | 250.7                     | 287.8    | 1.68                       | 1130.8 ± 198.3             | 5.7 ± 0.2                                          |
| 66    | 2.22                                | 11.4                              | 250.6                     | 288.0    | 1.68                       | 905.7 ± 19.5               | 5.7 ± 0.0                                          |
| 67    | 1.61                                | 11.4                              | 250.8                     | 315.1    | 1.79                       | 616.8 ± 86.5               | 3.7 ± 0.1                                          |
| 68    | 1.57                                | 11.4                              | 250.6                     | 315.1    | 1.79                       | 478.5 ± 42.5               | 3.7 ± 0.0                                          |

<sup>a</sup> deduced with  $\sigma_{\text{CH}_3\text{CHI}_2} = 3.61 \times 10^{18} \text{ cm}^{-2}$  at 296 nm.<sup>1</sup><sup>b</sup> ±1  $\sigma$  of the fitting error.

## Error estimation

The errors of the reaction rate coefficients were estimated by considering mainly (i) the uncertainties in the methanol concentrations and (ii) the experimental stability. Assuming that all these uncertainties are uncorrelated, we estimated the error bar as below.

The UV absorption of methanol was recorded in a glass cell at wavelengths 190 – 220 nm. The concentration of methanol was derived by using the Beer-Lambert law. The main uncertainty comes from the literature absolute cross section of methanol, which is 5%.<sup>3</sup> The relative error of the absorbance measurement is 2%, mainly due to the baseline drifting. The effective length of the absorption cell is  $90.3 \pm 0.1$  cm.

The  $[\text{CH}_3\text{OH}]$  in the reactor was derived by taking into account the dilution factor of the flow mixing, the changes of pressures and temperatures between the glass cell and the reactor. All the flows were controlled by mass flow controllers (Brooks, 5850 or 5850E). The error of the flow dilution is about 1.4%. The temperature of the glass cell and the reactor were monitored by a temperature sensor (Rotronic, HC2-S,  $\pm 0.1$  K at 10-30 °C) and three resistance temperature detectors (RTD, omega,  $\pm 0.5$  K after calibration) located at the middle and two ends of the reactor. All the pressures were measured by diaphragm gauges (INFICON,  $\pm 0.2$  % of reading). Since the errors of the temperature and pressure measurements are small, compared to the error of the flow dilution, the error for  $[\text{CH}_3\text{OH}]$  was estimated to be  $[(5\%)^2 + (2\%)^2 + (1.4\%)^2]^{0.5} = 5.6\%$  (consider the relative uncertainties in the cross section, absorbance measurement, and flow dilution, respectively).

The experimental stability may show up in the scatter of the rate coefficients ( $k_{2\text{Hs}}/k_{2\text{Ds}}/k_{2\text{Hsd}}$  values) measured under similar experimental conditions (*i.e.* at the same  $T$  and  $P$ ) or the error of the fitting process (shown in Tables S2-S5). We chose the standard deviation of the former (5% for  $k_{2\text{Hs}}$ ) to present the stability error because it is usually larger than that of the latter.

For the reaction of *syn*- $\text{CH}_3\text{CHOO} + 2\text{CH}_3\text{OH}$ , we estimated the final error of  $k_{2\text{Hs}}$  to be  $[(2 \times 5.6\%)^2 + (5\%)^2]^{0.5} = 12\%$  (consider the relative uncertainties in  $[\text{CH}_3\text{OH}]$  and the stability of the  $k_{2\text{Hs}}$  values, respectively). Based on similar discussion, for the reaction of *anti*- $\text{CH}_3\text{CHOO} + \text{CH}_3\text{OH}$ , the final error of  $k_{1\text{Ha}}$  is estimated to be  $[5.6\%^2 + 8\%^2]^{0.5} = 10\%$ . Since the error of the activation energy only depends on the relative values of the rate coefficients, we used the fitting error to represent the error bar of the activation energy.

## Kinetic analysis for the reaction *anti*-CH<sub>3</sub>CHOO+CH<sub>3</sub>OH

Both *anti*- and *syn*-CH<sub>3</sub>CHOO were generated in the reactor by the UV photolysis of 1,1-diiodoethane/O<sub>2</sub> mixture.<sup>4,5</sup> The absorption signals of both conformers were monitored in real time at 365 nm, where *anti*-CH<sub>3</sub>CHOO has stronger absorption signal. Typical time traces were shown in Figure S2.

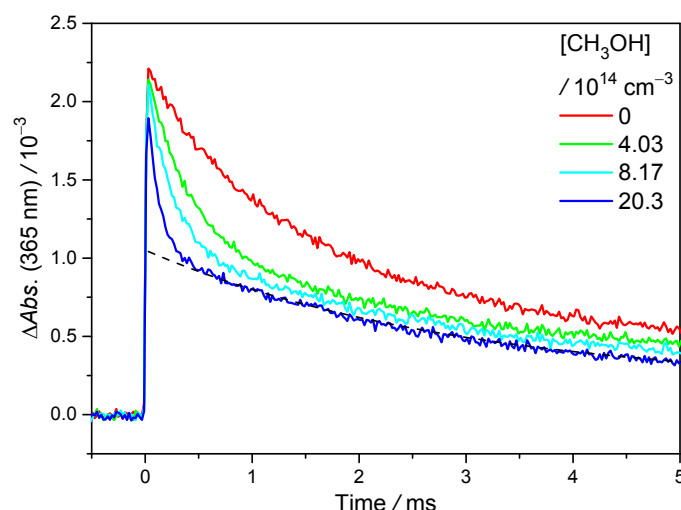

**Fig. S2.** Typical time traces of CH<sub>3</sub>CHOO absorption signal at 365 nm under different [CH<sub>3</sub>OH] at 298 K and 250 Torr (Exp#52). The photolysis laser sets the time zero. In the presence of CH<sub>3</sub>OH, the time traces show a fast decay and a slow decay, which are assigned to *anti*-CH<sub>3</sub>CHOO and *syn*-CH<sub>3</sub>CHOO, respectively. The dashed line is the exponential fit to the slow decay of the blue line.

In Figure S2, the time traces of [CH<sub>3</sub>OH] > 0 show a fast decay (<1 ms) and a slow decay (up to 5 ms). Based on the fact that *anti*-CH<sub>3</sub>CHOO reacts with CH<sub>3</sub>OH faster than *syn*-CH<sub>3</sub>CHOO does, the fast decay was assigned to *anti*-CH<sub>3</sub>CHOO and the slow decay to *syn*-CH<sub>3</sub>CHOO.<sup>5</sup> The highest [CH<sub>3</sub>OH] used in this experiment was about  $2 \times 10^{15} \text{ cm}^{-3}$ , which has negligible effect on the decay lifetime of *syn*-CH<sub>3</sub>CHOO. The signals of *anti*-CH<sub>3</sub>CHOO under various [CH<sub>3</sub>OH] were obtained by subtracting the signal of *syn*-CH<sub>3</sub>CHOO at the highest [CH<sub>3</sub>OH] and were fitted by an exponential function.

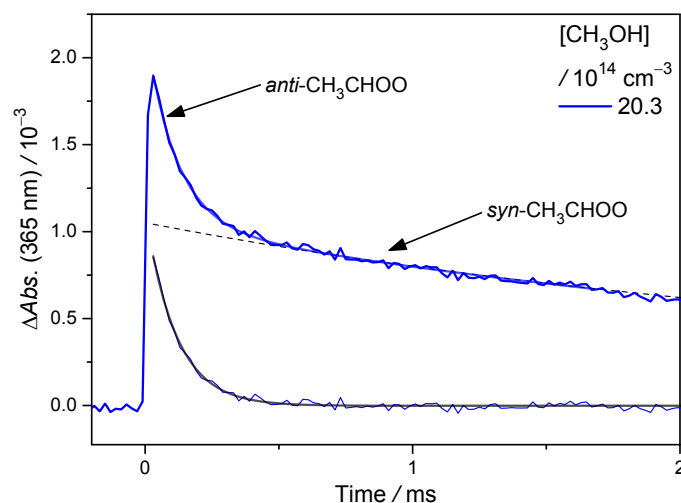

**Fig. S3.** The partition of the signals of *anti*- and *syn*-CH<sub>3</sub>CHOO probed at 365 nm. Dashed line is the exponential fit to the slow decay of the time trace. The signal of *anti*-CH<sub>3</sub>CHOO was obtained by subtracting the fitted exponential function from the raw data. The black line is the exponential fit to the “net” fast decay trace.

Figure S3 shows the separation of the signal of *anti*-CH<sub>3</sub>CHOO from the signal of *syn*-CH<sub>3</sub>CHOO. The net fast decay trace was fitted by an exponential function to yield the observed rate coefficient,  $k_{\text{obs}(\text{anti})}$ . The experiments were carried out under 288-315 K and 100-501 Torr. All the experimental conditions and the fitting results were summarized in Table S5. As shown in Figure S4, the  $k_{\text{obs}(\text{anti})}$  showed good linearity under all studied conditions. We used the following equation to analysis the kinetics of *anti*-CH<sub>3</sub>CHOO reaction with methanol.

$$-\frac{d[\text{anti-CH}_3\text{CHOO}]}{dt} = (k_{0a} + k_{1\text{Ha}}[\text{CH}_3\text{OH}])(\text{anti-CH}_3\text{CHOO})$$

$$= k_{\text{obs}(\text{anti})}[\text{anti-CH}_3\text{CHOO}]$$

Where  $k_{0a}$  denotes the background decay rate of *anti*-CH<sub>3</sub>CHOO when [CH<sub>3</sub>OH] = 0 and  $k_{1\text{Ha}}$  denotes the bimolecular rate coefficient.

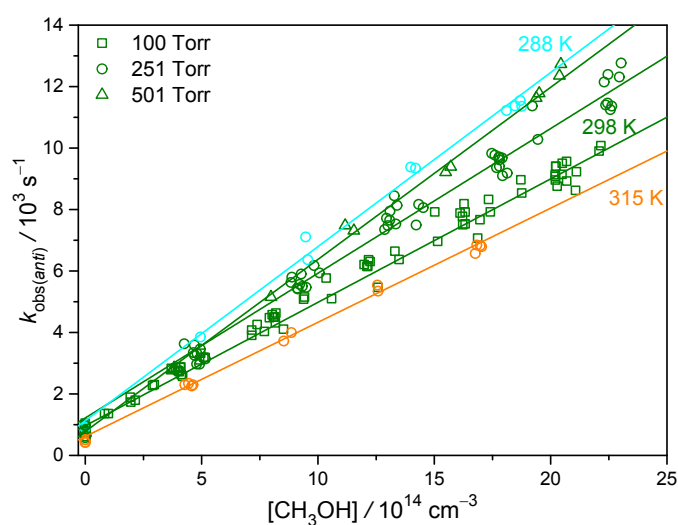

**Fig. S4.** Plot of the observed decay rate coefficient of *anti*-CH<sub>3</sub>CHOO as a function of [CH<sub>3</sub>OH] under 288, 298 and 315 K and 251 Torr (exp # 56-62 and 65-68). At 298K, experiments were also carries out under 100 and 501 Torr (exp # 49-55, 63 and 64). The  $k_{\text{obs(anti)}}$  shows a linear dependence on [CH<sub>3</sub>OH]. Solid lines are the linear fit. The reaction rate between *anti*-CH<sub>3</sub>CHOO and CH<sub>3</sub>OH is faster at lower temperature, showing a negative temperature effect.

Figure S5 shows the Arrhenius plot of  $k_{1\text{Ha}}$ . We found that  $k_{1\text{Ha}}$  has a weak negative temperature dependence with an activation energy  $E_a = -(2.8 \pm 0.3)$  kcal mol<sup>-1</sup>, which is close to the calculated transition state energy ( $-4.87$  kcal mol<sup>-1</sup>). The bimolecular rate coefficients was determined to be  $k_{1\text{Ha}} = (4.9 \pm 0.5) \times 10^{-12}$  cm<sup>3</sup> s<sup>-1</sup> at 250 Torr and 298 K. Theory overestimated the absolute value of the rate coefficient about a factor of 2. The potential energy surface of the reaction *anti*-CH<sub>3</sub>CHOO+1CH<sub>3</sub>OH was shown in Figure S6. We found two reaction pathways, differing from the orientation of the methyl group of CH<sub>3</sub>OH. The transition state energy is lower than the reactants due to the strong interaction of *anti*-CH<sub>3</sub>CHOO with CH<sub>3</sub>OH.<sup>6</sup> The methoxymethyl hydroperoxide has been predicted as the product by theory.

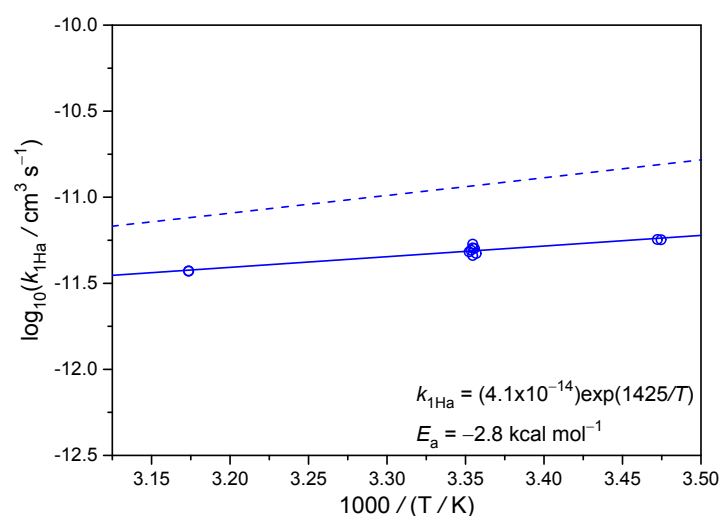

**Fig. S5.** Arrhenius plot of the reaction *anti*-CH<sub>3</sub>CHOO+CH<sub>3</sub>OH (Exp# 56-62,65-68) at 251 Torr. The  $k_{1Ha}$  shows a good linearity for  $T = 288$ -315 K with a negative temperature effect. The solid line is linear regression. The dashed line presents the calculated rate coefficients.

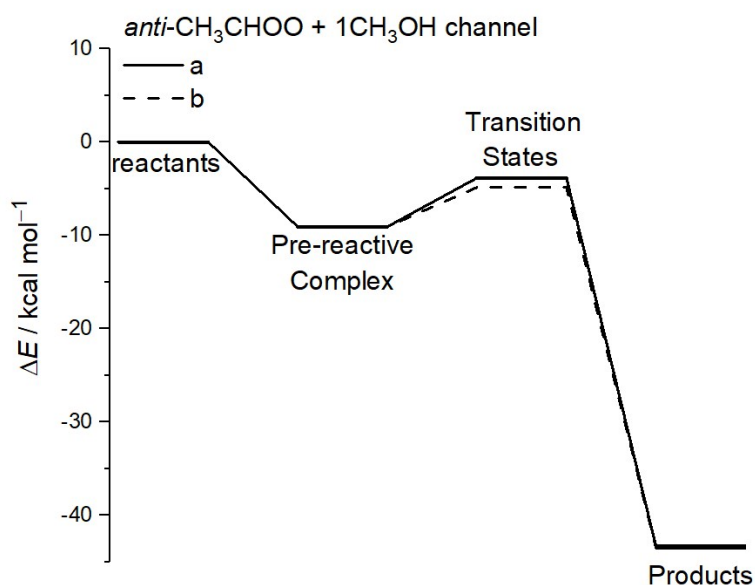

**Fig. S6.** Potential energy diagram for the reaction *anti*-CH<sub>3</sub>CHOO+1CH<sub>3</sub>OH. The solid and dashed lines represent difference reaction pathway (a, b). Energies were calculated at QCISD(T)/CBS//B3LYP/6-311+G(2d,2p) and vibrational zero-point energy corrections at B3LYP/6-311+G(2d,2p).

## Pressure dependence for the reactions of CH<sub>3</sub>OH with *anti*- and *syn*-CH<sub>3</sub>CHOO

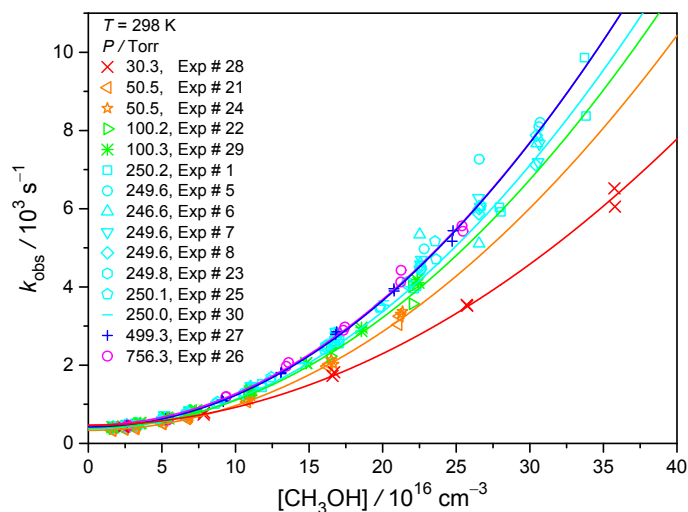

**Fig. S7.** Plot of the  $k_{\text{obs}}$  of *syn*-CH<sub>3</sub>CHOO as a function of [CH<sub>3</sub>OH] at 30-756 Torr and 298 K (Exp #1, 5-8, 21-30). The observed decay rate coefficients show quadratic dependences on [CH<sub>3</sub>OH]. The solid lines are pure quadratic equation fit.

The plot of  $k_{\text{obs}}$  as a function of [CH<sub>3</sub>OH] for the reaction *syn*-CH<sub>3</sub>CHOO+2CH<sub>3</sub>OH at 30-756 Torr is shown in Figure S7. Figure S8 shows  $k_{2\text{Hs}}$  and  $k_{1\text{Ha}}$  as functions of the total pressure. We observed that  $k_{2\text{H}}$  increases with the total pressure for  $P < 100$  Torr and reaches an asymptote near 250 Torr.

Under the low pressure conditions (<100Torr), methanol replaced more than 10% of the buffer gas (N<sub>2</sub>) when we scanned [CH<sub>3</sub>OH]. Since CH<sub>3</sub>OH has a permanent dipole moment and a few low-frequency vibrational modes, the energy transfer efficiency between *syn*-CH<sub>3</sub>CHOO and CH<sub>3</sub>OH could be significantly better than the case of N<sub>2</sub>; therefore, the reaction environment changes dramatically when scanning [CH<sub>3</sub>OH], resulting in an uncertainty of the observed pressure effect. Thus, we should consider the error bar of the pressure dependence is larger at  $P < 100$  Torr.

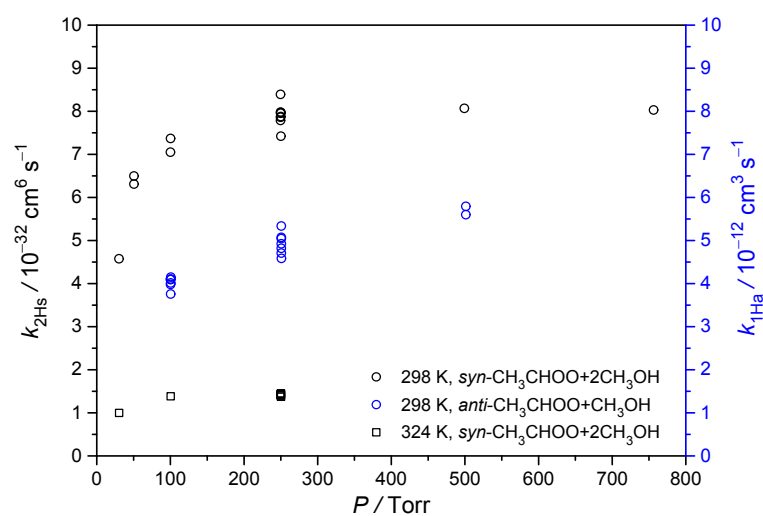

**Fig. S8.** The pressure dependence of the rate coefficients of the reaction *syn*-CH<sub>3</sub>CHOO+2CH<sub>3</sub>OH (left axis) at 298 K (black circle, Exp #1, 5-8, 21-30) and at 324K (black square, Exp # 3, 17-20, 31-33, 37-39), and the reaction *anti*-CH<sub>3</sub>CHOO+CH<sub>3</sub>OH (right axis, blue circle, Exp #56-68). No significant pressure effect was observed for the reaction *syn*-CH<sub>3</sub>CHOO+2CH<sub>3</sub>OH at 250-756 Torr while  $k_{1Ha}$  increases very slightly for  $P \geq 250$  Torr.

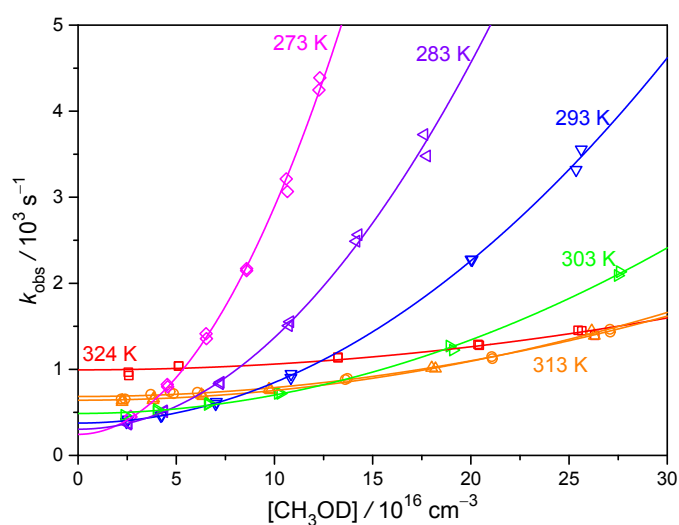

**Fig. S9.** Plot of  $k_{\text{obs}}$  of *syn*-CH<sub>3</sub>CHOO as a function of [CH<sub>3</sub>OD] at 273-324 K and 250 Torr (Exp# 40-46). The observed decay rate coefficient shows a quadratic dependence on [CH<sub>3</sub>OD]. The solid lines are pure quadratic fit. Similar to the reaction *syn*-CH<sub>3</sub>CHOO+2CH<sub>3</sub>OH, a negative temperature dependence was observed.

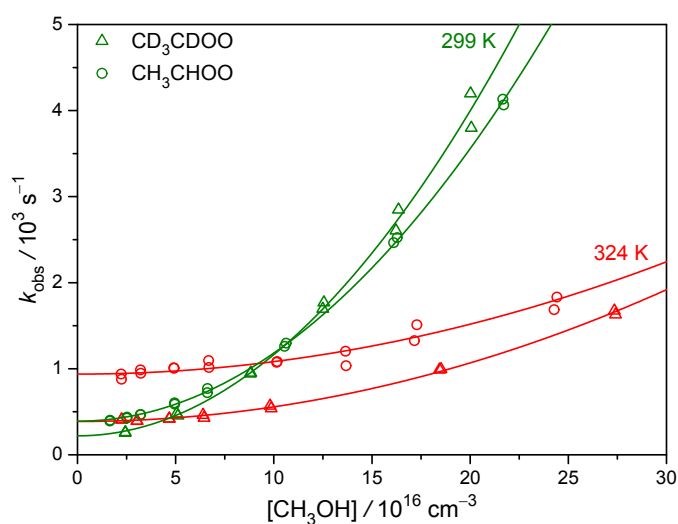

**Fig. S10.** Plot of  $k_{\text{obs}}$  of *syn*-CD<sub>3</sub>CDOO and *syn*-CH<sub>3</sub>CHOO as a function of [CH<sub>3</sub>OH] at 299-324 K and 250 Torr (Exp# 20,23,47,48). The solid lines are pure quadratic fit. Notably,  $k_{\text{osd}}$  (*syn*-CD<sub>3</sub>CDOO) is smaller than  $k_{\text{os}}$  (*syn*-CH<sub>3</sub>CHOO) at the same temperature, especially at 324 K, consistent with the isotope effect of the thermal decomposition of *syn*-CH<sub>3</sub>CHOO.<sup>7,8</sup>

## Synthesis of $\text{CD}_3\text{CDI}_2$

The precursor,  $\text{CD}_3\text{CDI}_2$ , was synthesized by following a reported method with a few modifications.<sup>9</sup> 20 gram of hydrazine monohydrate ( $\text{H}_2\text{NNH}_2 \cdot \text{H}_2\text{O}$ , Wako, >97%) was refluxed 30 min to remove water with the opened end of the condenser connected to a drying tube. Then, 10 g of acetaldehyde- $\text{d}_4$  ( $\text{CD}_3\text{COD}$ , CDN, >99.5%) was slowly added in hydrazine (water bath, >1hr) to get acetaldehyde hydrazone,  $(\text{CD}_3)\text{CD}=\text{NH}_2$ .

The solution in the flask was split and extracted by either ethyl ether or dichloromethane. We found that the efficiency to extract hydrazone by ethyl ether is low and we lost more than half of the products in this step; on the other hand, we succeeded to extract the hydrazone by using dichloromethane. Then, the solution was washed by saturated NaCl aqueous solution and was dried with  $\text{MgSO}_4$ . Finally, dichloromethane was removed by immersing the container in warm water bath ( $\sim 45^\circ\text{C}$ ).

The saturated solution of iodine in ether was added into the solution of hydrazone in ether and tetramethyl amine (TEA). The reaction is instantaneous and can be judged by the cessation of evolution of nitrogen gas and the persistence of iodine color. Due to the iodine salt formation, a 250 mL bottle was used to make the stir bar stir smoothly. After the reaction completed, the solution was extracted by ether and washed consecutively with 5%  $\text{Na}_2\text{S}_2\text{O}_3$  (quenching iodine), 3M HCl (quenching TEA), 5 %  $\text{Na}_2\text{CO}_3$  (neutralizing HCl), and saturated NaCl aqueous solution (removing water). Ethyl ether was removed after drying with  $\text{MgSO}_{4(\text{s})}$ . The whole process mentioned above should be carefully done in a light-avoiding condition to prevent the photolysis of iodine.

The final yield of  $\text{CD}_3\text{CDI}_2$  was very low because of the step extracting hydrazone with ethyl ether. We did not have enough amounts of  $\text{CD}_3\text{CDI}_2$  to check the purity. Based on the facts that (1) we used acetaldehyde- $\text{d}_4$  as the starting material, (2) the UV absorption signal in the Criegee intermediate experiment shows a fast and a slow decay in the presence of methanol, and (3) the background decay rate ( $k_{0\text{sd}}$ ) is smaller than that of *syn*- $\text{CH}_3\text{CHOO}$  ( $k_{0\text{s}}$ ) (Table. S2 and S4) indicating a slower thermal decomposition rate of *syn*- $\text{CD}_3\text{CDOO}$ , we believed that  $\text{CD}_3\text{CDI}_2$  has been synthesized.

## Details of the quantum chemistry calculation

As mentioned in the main text, we obtained the geometries for the reactants and transition states (TS) by using B3LYP/6-311+G(2d,2p), and following our previous protocol for the reactions of Criegee intermediates, we refined the energies using the QCISD(T) complete basis set (CBS) extrapolation with Dunning's basis sets, aug-cc-pVDZ, aug-cc-pVTZ and aug-cc-pVQZ.

Due to the limitation of our computational resource, we were not able to perform the aug-cc-pVQZ calculation for the *syn*-CH<sub>3</sub>CHOO+2CH<sub>3</sub>OH reaction. However, we noticed a correlation between the one methanol reaction versus the two methanol reaction for the ratio between QCISD(T)/aug-cc-pVTZ and QCISD(T)/CBS energies. We estimated the CBS value of the transition states of *syn*-CH<sub>3</sub>CHOO+2CH<sub>3</sub>OH by the following strategy: (1) we used B3LYP geometries to perform single point calculation with QCISD(T) aug-cc-pVTZ for all the transition states of CH<sub>2</sub>OO+CH<sub>3</sub>OH, CH<sub>2</sub>OO+2CH<sub>3</sub>OH, *syn*-CH<sub>3</sub>CHOO+CH<sub>3</sub>OH, and *syn*-CH<sub>3</sub>CHOO+2CH<sub>3</sub>OH. (2) For the transition states of CH<sub>2</sub>OO+CH<sub>3</sub>OH, CH<sub>2</sub>OO+2CH<sub>3</sub>OH, and *syn*-CH<sub>3</sub>CHOO+CH<sub>3</sub>OH, we performed aug-cc-pVQZ calculations and obtained the CBS energy  $E_{\text{CBS}}$ . (3) We obtained the ratio between the CBS and aug-cc-pVTZ energies,  $R=(E_{\text{CBS}}/E_{\text{AVTZ}})$ . Finally, the approximate CBS energy of the *syn*-CH<sub>3</sub>CHOO+2CH<sub>3</sub>OH system is obtained by the following equation.

$$E_{\text{extrap},2\text{CH}_3\text{OH}}^{\text{syn}-\text{CH}_3\text{CHOO}} = E_{\text{AVTZ},2\text{CH}_3\text{OH}}^{\text{syn}-\text{CH}_3\text{CHOO}} \times \frac{R_{1\text{CH}_3\text{OH}}^{\text{syn}-\text{CH}_3\text{CHOO}} \times R_{2\text{CH}_3\text{OH}}^{\text{CH}_2\text{OO}}}{R_{1\text{CH}_3\text{OH}}^{\text{CH}_2\text{OO}}}$$

This scaling strategy is based on the assumption that the ratio of  $E_{\text{CBS}}/E_{\text{AVTZ}}$  does not depend strongly on the substituent groups of the CIs.

To test the validity of this method, we used the same method to estimate the TS energies for *syn*-CH<sub>3</sub>CHOO+2H<sub>2</sub>O and compared them with  $E_{\text{CBS}}$ , for which we still can perform the QCISD(T)/aug-cc-pVQZ calculations. The reaction barriers obtained by the above scaling method differ from the values obtained from the real CBS extrapolation only by 0.1 kcal mol<sup>-1</sup>. Therefore, we think the error of the linear scaling is small compared to other uncertainties, such as the multireference effect, the partition function calculation and tunneling correction, etc.

**Table S6.** Zero-point corrected transition state energies (QCISD(T)/CBS//B3LYP/6-311+G(2d,2p)) for the studied reactions forming methoxymethyl hydroperoxide unless noted otherwise. The vibrational frequencies were calculated at B3LYP/6-311+G(2d,2p). The zero of the energy is set to infinitely separated reactants.

| QCISD(T)/CBS in kcal mol <sup>-1</sup>                              | a      | b      | c      | d      |
|---------------------------------------------------------------------|--------|--------|--------|--------|
| <i>anti</i> -CH <sub>3</sub> CHOO + 1CH <sub>3</sub> OH             | -3.85  | -4.87  |        |        |
| <i>syn</i> -CH <sub>3</sub> CHOO + 1CH <sub>3</sub> OH              | 3.99   | 1.91   | 5.57*  | 6.10*  |
| <i>syn</i> -CH <sub>3</sub> CHOO + 2CH <sub>3</sub> OH <sup>†</sup> | -14.45 | -13.52 | -11.95 | -14.72 |
| <i>syn</i> -CH <sub>3</sub> CHOO + 2CH <sub>3</sub> OD <sup>†</sup> | -14.06 | -12.90 | -11.28 | -14.27 |
| <i>syn</i> -CD <sub>3</sub> CDOO + 2CH <sub>3</sub> OH <sup>†</sup> | -14.72 | -13.75 | -12.18 | -15.03 |

\* The product is vinyl hydroperoxide.

<sup>†</sup> Approximate CBS energy. See **Details of the quantum chemistry calculation** on page S18.

**Table S7.** The tunneling correction factors at room temperature by using the asymmetric Eckart barrier approximations.

| tunneling correction                                   | 2a    | 2b    | 2c    | 2d    |
|--------------------------------------------------------|-------|-------|-------|-------|
| <i>syn</i> -CH <sub>3</sub> CHOO + 2CH <sub>3</sub> OH | 1.165 | 1.310 | 1.348 | 1.201 |
| <i>syn</i> -CH <sub>3</sub> CHOO + 2CH <sub>3</sub> OD | 1.145 | 1.243 | 1.262 | 1.172 |
| <i>syn</i> -CD <sub>3</sub> CDOO + 2CH <sub>3</sub> OH | 1.163 | 1.307 | 1.340 | 1.202 |

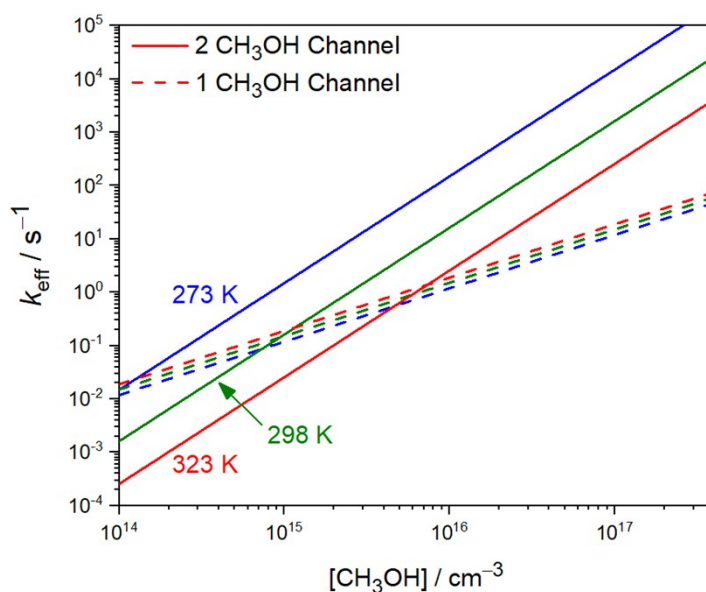

**Fig. S12.** The calculated effective decay rate coefficients of *syn*-CH<sub>3</sub>CHOO reaction with 1CH<sub>3</sub>OH (dashed line) and 2CH<sub>3</sub>OH (solid line) at 273, 298 and 323 K.

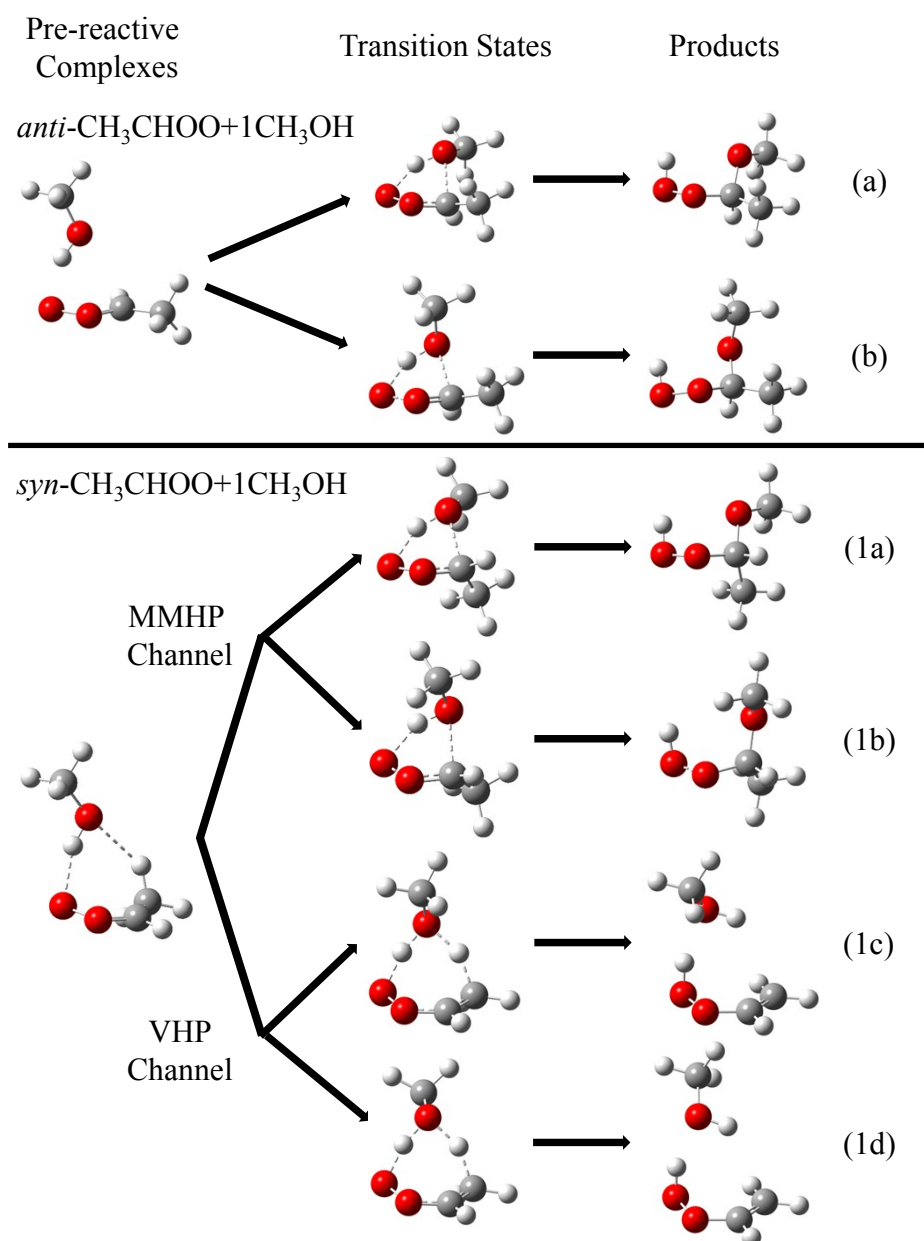

**Fig. S13.** Pre-reactive complex, transition state and product geometries for the reaction *anti*-CH<sub>3</sub>CHOO+1CH<sub>3</sub>OH and *syn*-CH<sub>3</sub>CHOO+1CH<sub>3</sub>OH. For *syn*-CH<sub>3</sub>CHOO+1CH<sub>3</sub>OH, two product channels to form either methoxymethyl hydroperoxide (MMHP) or vinyl hydroperoxide (VHP) were found. Notably, the methanol molecule acts as a catalyst for the VHP channel.

**Table S8.** Rotational temperatures ( $\theta_R$ ) and the corresponding partition functions ( $q_R$ ) at 298 K for isolated CH<sub>3</sub>OH/CH<sub>3</sub>OD and the transition states of the reactions *syn*-CH<sub>3</sub>CHOO+2CH<sub>3</sub>OH/CH<sub>3</sub>OD.

| CH <sub>3</sub> OH |                         | CH <sub>3</sub> OD |                         | TS for<br><i>syn</i> -CH <sub>3</sub> CHOO+2CH <sub>3</sub> OH |                         | TS for<br><i>syn</i> -CH <sub>3</sub> CHOO+2CH <sub>3</sub> OD |                         |
|--------------------|-------------------------|--------------------|-------------------------|----------------------------------------------------------------|-------------------------|----------------------------------------------------------------|-------------------------|
| $\theta_R$ / K     | $q_R$ / 10 <sup>3</sup> | $\theta_R$ / K     | $q_R$ / 10 <sup>3</sup> | $\theta_R$ / K                                                 | $q_R$ / 10 <sup>5</sup> | $\theta_R$ / K                                                 | $q_R$ / 10 <sup>5</sup> |
| 6.1783             | 3.16                    | 5.3320             | 3.63                    | 0.0993                                                         | 4.57                    | 0.0985                                                         | 4.61                    |
| 1.1840             |                         | 1.1226             |                         | 0.0732                                                         |                         | 0.0729                                                         |                         |
| 1.1434             |                         | 1.0566             |                         | 0.0549                                                         |                         | 0.0546                                                         |                         |

**Table S9.** Vibrational frequencies and the corresponding partition functions at 298 K for CH<sub>3</sub>OH/CH<sub>3</sub>OD and the transition states (TS) of the reactions *syn*-CH<sub>3</sub>CHOO+2CH<sub>3</sub>OH/CH<sub>3</sub>OD. The vibrational partition functions were calculated by using harmonic approximation. For the transition state partition functions, only the lowest 12 vibrational modes are listed since they dominate the total vibrational partition function.

| CH <sub>3</sub> OH       |       | CH <sub>3</sub> OD       |       | TS for<br><i>syn</i> -CH <sub>3</sub> CHOO+2CH <sub>3</sub> OH |       | TS for<br><i>syn</i> -CH <sub>3</sub> CHOO+2CH <sub>3</sub> OD |       |
|--------------------------|-------|--------------------------|-------|----------------------------------------------------------------|-------|----------------------------------------------------------------|-------|
| $\nu$ / cm <sup>-1</sup> | $q_v$ | $\nu$ / cm <sup>-1</sup> | $q_v$ | $\nu$ / cm <sup>-1</sup>                                       | $q_v$ | $\nu$ / cm <sup>-1</sup>                                       | $q_v$ |
| 284.6                    | 1.34  | 228.1                    | 1.50  | 46.8                                                           | 4.94  | 44.2                                                           | 5.21  |
| 1037.9                   | 1.01  | 871.3                    | 1.02  | 80.1                                                           | 3.12  | 83.4                                                           | 3.02  |
| 1077.3                   | 1.01  | 1041.6                   | 1.01  | 95.9                                                           | 2.70  | 95.0                                                           | 2.72  |
| 1169.7                   | 1.00  | 1169.6                   | 1.00  | 135.6                                                          | 2.08  | 136.3                                                          | 2.07  |
| 1371.9                   | 1.00  | 1247.8                   | 1.00  | 142.3                                                          | 2.01  | 142.2                                                          | 2.01  |
| 1481.0                   | 1.00  | 1480.8                   | 1.00  | 159.4                                                          | 1.86  | 157.7                                                          | 1.88  |
| 1501.4                   | 1.00  | 1501.5                   | 1.00  | 174.3                                                          | 1.76  | 181.6                                                          | 1.71  |
| 1512.7                   | 1.00  | 1510.9                   | 1.00  | 217.5                                                          | 1.54  | 215.4                                                          | 1.55  |
| 3003.2                   | 1.00  | 2804.6                   | 1.00  | 224.7                                                          | 1.51  | 223.5                                                          | 1.52  |
| 3049.2                   | 1.00  | 3003.9                   | 1.00  | 296.0                                                          | 1.32  | 294.6                                                          | 1.32  |
| 3119.2                   | 1.00  | 3049.8                   | 1.00  | 328.5                                                          | 1.26  | 323.5                                                          | 1.27  |
| 3851.6                   | 1.00  | 3120.3                   | 1.00  | 398.5                                                          | 1.17  | 388.5                                                          | 1.18  |

**Table S10.** Calculated reaction rate coefficients as a function of temperature (in K) by using the transition state theory. The unit is  $\text{cm}^6 \text{s}^{-1}$  for termolecular reactions and  $\text{cm}^3 \text{s}^{-1}$  for bimolecular reactions. The tunneling correction has been included.

| <i>syn</i> -CH <sub>3</sub> CHOO + 2CH <sub>3</sub> OH | 2a       | 2b       | 2c       | 2d       | total    |
|--------------------------------------------------------|----------|----------|----------|----------|----------|
| 223.15                                                 | 2.16E-28 | 3.98E-29 | 9.42E-31 | 3.72E-28 | 6.29E-28 |
| 228.15                                                 | 1.05E-28 | 2.00E-29 | 5.08E-31 | 1.77E-28 | 3.03E-28 |
| 233.15                                                 | 5.28E-29 | 1.04E-29 | 2.82E-31 | 8.70E-29 | 1.50E-28 |
| 238.15                                                 | 2.72E-29 | 5.54E-30 | 1.61E-31 | 4.42E-29 | 7.72E-29 |
| 243.15                                                 | 1.45E-29 | 3.04E-30 | 9.44E-32 | 2.32E-29 | 4.08E-29 |
| 248.15                                                 | 7.90E-30 | 1.71E-30 | 5.66E-32 | 1.25E-29 | 2.21E-29 |
| 253.15                                                 | 4.42E-30 | 9.84E-31 | 3.46E-32 | 6.88E-30 | 1.23E-29 |
| 258.15                                                 | 2.54E-30 | 5.80E-31 | 2.16E-32 | 3.90E-30 | 7.03E-30 |
| 263.15                                                 | 1.49E-30 | 3.50E-31 | 1.38E-32 | 2.26E-30 | 4.10E-30 |
| 268.15                                                 | 8.92E-31 | 2.16E-31 | 8.94E-33 | 1.33E-30 | 2.45E-30 |
| 273.15                                                 | 5.46E-31 | 1.35E-31 | 5.90E-33 | 8.04E-31 | 1.49E-30 |
| 278.15                                                 | 3.40E-31 | 8.60E-32 | 3.96E-33 | 4.94E-31 | 9.24E-31 |
| 283.15                                                 | 2.16E-31 | 5.58E-32 | 2.70E-33 | 3.10E-31 | 5.84E-31 |
| 288.15                                                 | 1.39E-31 | 3.68E-32 | 1.86E-33 | 1.98E-31 | 3.75E-31 |
| 293.15                                                 | 9.08E-32 | 2.46E-32 | 1.30E-33 | 1.28E-31 | 2.45E-31 |
| 298.15                                                 | 6.04E-32 | 1.68E-32 | 9.26E-34 | 8.42E-32 | 1.62E-31 |
| 303.15                                                 | 4.08E-32 | 1.16E-32 | 6.66E-34 | 5.64E-32 | 1.09E-31 |
| 308.15                                                 | 2.78E-32 | 8.08E-33 | 4.84E-34 | 3.82E-32 | 7.46E-32 |
| 313.15                                                 | 1.93E-32 | 5.70E-33 | 3.56E-34 | 2.62E-32 | 5.16E-32 |
| 318.15                                                 | 1.35E-32 | 4.08E-33 | 2.64E-34 | 1.82E-32 | 3.61E-32 |
| 323.15                                                 | 9.62E-33 | 2.96E-33 | 1.99E-34 | 1.28E-32 | 2.56E-32 |
| 333.17                                                 | 5.00E-33 | 1.60E-33 | 1.15E-34 | 6.56E-33 | 1.33E-32 |
| 348.09                                                 | 2.04E-33 | 6.84E-34 | 5.46E-35 | 2.62E-33 | 5.40E-33 |
| 353.66                                                 | 1.49E-33 | 5.10E-34 | 4.20E-35 | 1.90E-33 | 3.94E-33 |
| 360                                                    | 1.06E-33 | 3.68E-34 | 3.16E-35 | 1.33E-33 | 2.79E-33 |

| <i>syn</i> -CH <sub>3</sub> CHOO + 2CH <sub>3</sub> OD | 2a       | 2b       | 2c       | 2d       | total    |
|--------------------------------------------------------|----------|----------|----------|----------|----------|
| 223.15                                                 | 5.06E-29 | 5.04E-30 | 1.01E-31 | 7.98E-29 | 1.36E-28 |
| 228.15                                                 | 2.50E-29 | 2.62E-30 | 5.62E-32 | 3.88E-29 | 6.65E-29 |
| 233.15                                                 | 1.28E-29 | 1.39E-30 | 3.24E-32 | 1.95E-29 | 3.37E-29 |
| 238.15                                                 | 6.70E-30 | 7.64E-31 | 1.91E-32 | 1.01E-29 | 1.76E-29 |
| 243.15                                                 | 3.62E-30 | 4.30E-31 | 1.15E-32 | 5.40E-30 | 9.45E-30 |
| 248.15                                                 | 2.00E-30 | 2.50E-31 | 7.10E-33 | 2.96E-30 | 5.21E-30 |
| 253.15                                                 | 1.14E-30 | 1.47E-31 | 4.48E-33 | 1.66E-30 | 2.95E-30 |
| 258.15                                                 | 6.62E-31 | 8.88E-32 | 2.86E-33 | 9.52E-31 | 1.71E-30 |
| 263.15                                                 | 3.92E-31 | 5.48E-32 | 1.88E-33 | 5.60E-31 | 1.01E-30 |
| 268.15                                                 | 2.38E-31 | 3.44E-32 | 1.25E-33 | 3.36E-31 | 6.11E-31 |
| 273.15                                                 | 1.47E-31 | 2.20E-32 | 8.44E-34 | 2.06E-31 | 3.76E-31 |
| 278.15                                                 | 9.28E-32 | 1.44E-32 | 5.78E-34 | 1.29E-31 | 2.36E-31 |
| 283.15                                                 | 5.96E-32 | 9.52E-33 | 4.04E-34 | 8.16E-32 | 1.51E-31 |
| 288.15                                                 | 3.88E-32 | 6.40E-33 | 2.86E-34 | 5.28E-32 | 9.82E-32 |
| 293.15                                                 | 2.56E-32 | 4.36E-33 | 2.04E-34 | 3.46E-32 | 6.49E-32 |
| 298.15                                                 | 1.73E-32 | 3.02E-33 | 1.48E-34 | 2.30E-32 | 4.35E-32 |
| 303.15                                                 | 1.18E-32 | 2.12E-33 | 1.08E-34 | 1.56E-32 | 2.96E-32 |
| 308.15                                                 | 8.12E-33 | 1.50E-33 | 8.02E-35 | 1.07E-32 | 2.04E-32 |
| 313.15                                                 | 5.68E-33 | 1.08E-33 | 6.00E-35 | 7.44E-33 | 1.43E-32 |
| 318.15                                                 | 4.02E-33 | 7.86E-34 | 4.54E-35 | 5.22E-33 | 1.01E-32 |
| 323.15                                                 | 2.88E-33 | 5.76E-34 | 3.48E-35 | 3.72E-33 | 7.22E-33 |
| 333.17                                                 | 1.53E-33 | 3.20E-34 | 2.08E-35 | 1.94E-33 | 3.81E-33 |
| 348.09                                                 | 6.40E-34 | 1.43E-34 | 1.03E-35 | 7.98E-34 | 1.59E-33 |
| 353.66                                                 | 4.72E-34 | 1.08E-34 | 8.08E-36 | 5.84E-34 | 1.17E-33 |
| 360                                                    | 3.38E-34 | 7.96E-35 | 6.18E-36 | 4.16E-34 | 8.39E-34 |

| <i>syn</i> -CD <sub>3</sub> CDOO + 2CH <sub>3</sub> OH | 2a       | 2b       | 2c       | 2d       | total    |
|--------------------------------------------------------|----------|----------|----------|----------|----------|
| 223.15                                                 | 3.26E-28 | 5.18E-29 | 1.19E-30 | 6.44E-28 | 1.02E-27 |
| 228.15                                                 | 1.56E-28 | 2.58E-29 | 6.34E-31 | 3.02E-28 | 4.85E-28 |
| 233.15                                                 | 7.74E-29 | 1.32E-29 | 3.50E-31 | 1.47E-28 | 2.38E-28 |
| 238.15                                                 | 3.94E-29 | 6.96E-30 | 1.97E-31 | 7.36E-29 | 1.20E-28 |
| 243.15                                                 | 2.08E-29 | 3.78E-30 | 1.14E-31 | 3.80E-29 | 6.26E-29 |
| 248.15                                                 | 1.12E-29 | 2.10E-30 | 6.78E-32 | 2.02E-29 | 3.35E-29 |
| 253.15                                                 | 6.20E-30 | 1.20E-30 | 4.12E-32 | 1.10E-29 | 1.84E-29 |
| 258.15                                                 | 3.52E-30 | 7.02E-31 | 2.54E-32 | 6.14E-30 | 1.04E-29 |
| 263.15                                                 | 2.04E-30 | 4.20E-31 | 1.61E-32 | 3.52E-30 | 5.99E-30 |
| 268.15                                                 | 1.21E-30 | 2.56E-31 | 1.03E-32 | 2.06E-30 | 3.53E-30 |
| 273.15                                                 | 7.34E-31 | 1.59E-31 | 6.76E-33 | 1.23E-30 | 2.13E-30 |
| 278.15                                                 | 4.52E-31 | 1.01E-31 | 4.50E-33 | 7.48E-31 | 1.31E-30 |
| 283.15                                                 | 2.84E-31 | 6.48E-32 | 3.04E-33 | 4.64E-31 | 8.16E-31 |
| 288.15                                                 | 1.82E-31 | 4.24E-32 | 2.10E-33 | 2.92E-31 | 5.19E-31 |
| 293.15                                                 | 1.18E-31 | 2.82E-32 | 1.46E-33 | 1.88E-31 | 3.36E-31 |
| 298.15                                                 | 7.80E-32 | 1.90E-32 | 1.03E-33 | 1.23E-31 | 2.21E-31 |
| 303.15                                                 | 5.22E-32 | 1.30E-32 | 7.34E-34 | 8.12E-32 | 1.47E-31 |
| 308.15                                                 | 3.54E-32 | 9.04E-33 | 5.30E-34 | 5.46E-32 | 9.96E-32 |
| 313.15                                                 | 2.44E-32 | 6.36E-33 | 3.88E-34 | 3.72E-32 | 6.83E-32 |
| 318.15                                                 | 1.70E-32 | 4.52E-33 | 2.86E-34 | 2.56E-32 | 4.74E-32 |
| 323.15                                                 | 1.20E-32 | 3.26E-33 | 2.14E-34 | 1.79E-32 | 3.34E-32 |
| 333.17                                                 | 6.16E-33 | 1.74E-33 | 1.23E-34 | 9.04E-33 | 1.71E-32 |
| 348.09                                                 | 2.46E-33 | 7.34E-34 | 5.72E-35 | 3.54E-33 | 6.79E-33 |
| 353.66                                                 | 1.79E-33 | 5.42E-34 | 4.38E-35 | 2.54E-33 | 4.92E-33 |
| 360                                                    | 1.26E-33 | 3.90E-34 | 3.28E-35 | 1.77E-33 | 3.46E-33 |

| <i>syn</i> -CH <sub>3</sub> CHOO + CH <sub>3</sub> OH | 1a       | 1b       | 1c       | 1d       | total    |
|-------------------------------------------------------|----------|----------|----------|----------|----------|
| 273.15                                                | 1.30E-18 | 5.97E-17 | 6.83E-18 | 2.78E-18 | 7.07E-17 |
| 278.15                                                | 1.48E-18 | 6.35E-17 | 6.69E-18 | 2.74E-18 | 7.44E-17 |
| 283.15                                                | 1.67E-18 | 6.74E-17 | 6.62E-18 | 2.71E-18 | 7.85E-17 |
| 288.15                                                | 1.89E-18 | 7.15E-17 | 6.60E-18 | 2.72E-18 | 8.27E-17 |
| 293.15                                                | 2.12E-18 | 7.57E-17 | 6.62E-18 | 2.74E-18 | 8.72E-17 |
| 298.15                                                | 2.37E-18 | 8.00E-17 | 6.68E-18 | 2.78E-18 | 9.18E-17 |
| 303.15                                                | 2.65E-18 | 8.45E-17 | 6.78E-18 | 2.83E-18 | 9.68E-17 |
| 308.15                                                | 2.94E-18 | 8.91E-17 | 6.92E-18 | 2.90E-18 | 1.02E-16 |
| 313.15                                                | 3.27E-18 | 9.38E-17 | 7.10E-18 | 2.99E-18 | 1.07E-16 |
| 318.15                                                | 3.62E-18 | 9.87E-17 | 7.31E-18 | 3.09E-18 | 1.13E-16 |
| 323.15                                                | 3.99E-18 | 1.04E-16 | 7.54E-18 | 3.21E-18 | 1.18E-16 |
| 328.15                                                | 4.39E-18 | 1.09E-16 | 7.81E-18 | 3.35E-18 | 1.24E-16 |
| 333.15                                                | 4.82E-18 | 1.14E-16 | 8.11E-18 | 3.50E-18 | 1.31E-16 |
| 338.15                                                | 5.28E-18 | 1.20E-16 | 8.44E-18 | 3.66E-18 | 1.37E-16 |
| 343.15                                                | 5.78E-18 | 1.25E-16 | 8.81E-18 | 3.84E-18 | 1.44E-16 |
| 348.15                                                | 6.30E-18 | 1.31E-16 | 9.20E-18 | 4.04E-18 | 1.51E-16 |
| 353.15                                                | 6.86E-18 | 1.37E-16 | 9.63E-18 | 4.25E-18 | 1.58E-16 |
| 358.15                                                | 7.46E-18 | 1.43E-16 | 1.01E-17 | 4.48E-18 | 1.65E-16 |
| 363.15                                                | 8.09E-18 | 1.49E-16 | 1.06E-17 | 4.73E-18 | 1.73E-16 |
| 368.15                                                | 8.76E-18 | 1.55E-16 | 1.11E-17 | 5.00E-18 | 1.80E-16 |
| 373.15                                                | 9.47E-18 | 1.62E-16 | 1.17E-17 | 5.29E-18 | 1.88E-16 |
| 378.15                                                | 1.02E-17 | 1.69E-16 | 1.23E-17 | 5.59E-18 | 1.97E-16 |

| <i>anti</i> -CH <sub>3</sub> CHOO + CH <sub>3</sub> OH | a        | b        | total    |
|--------------------------------------------------------|----------|----------|----------|
| 273.15                                                 | 4.57E-12 | 1.98E-11 | 2.43E-11 |
| 278.15                                                 | 4.01E-12 | 1.67E-11 | 2.07E-11 |
| 283.15                                                 | 3.54E-12 | 1.43E-11 | 1.78E-11 |
| 288.15                                                 | 3.14E-12 | 1.22E-11 | 1.54E-11 |
| 293.15                                                 | 2.79E-12 | 1.05E-11 | 1.33E-11 |
| 298.15                                                 | 2.50E-12 | 9.14E-12 | 1.16E-11 |
| 303.15                                                 | 2.24E-12 | 7.96E-12 | 1.02E-11 |
| 308.15                                                 | 2.02E-12 | 6.97E-12 | 8.99E-12 |
| 313.15                                                 | 1.83E-12 | 6.13E-12 | 7.96E-12 |
| 318.15                                                 | 1.66E-12 | 5.42E-12 | 7.08E-12 |
| 323.15                                                 | 1.52E-12 | 4.81E-12 | 6.33E-12 |
| 328.15                                                 | 1.39E-12 | 4.29E-12 | 5.67E-12 |
| 333.15                                                 | 1.27E-12 | 3.84E-12 | 5.11E-12 |
| 338.15                                                 | 1.17E-12 | 3.45E-12 | 4.62E-12 |
| 343.15                                                 | 1.08E-12 | 3.10E-12 | 4.18E-12 |
| 348.15                                                 | 9.99E-13 | 2.81E-12 | 3.81E-12 |
| 353.15                                                 | 9.27E-13 | 2.55E-12 | 3.47E-12 |
| 358.15                                                 | 8.62E-13 | 2.32E-12 | 3.18E-12 |
| 363.15                                                 | 8.03E-13 | 2.11E-12 | 2.92E-12 |
| 368.15                                                 | 7.50E-13 | 1.94E-12 | 2.69E-12 |
| 373.15                                                 | 7.03E-13 | 1.78E-12 | 2.48E-12 |
| 378.15                                                 | 6.59E-13 | 1.63E-12 | 2.29E-12 |

## Representative time traces for the reaction of *syn*-CH<sub>3</sub>CHOO with CH<sub>3</sub>OH vapor

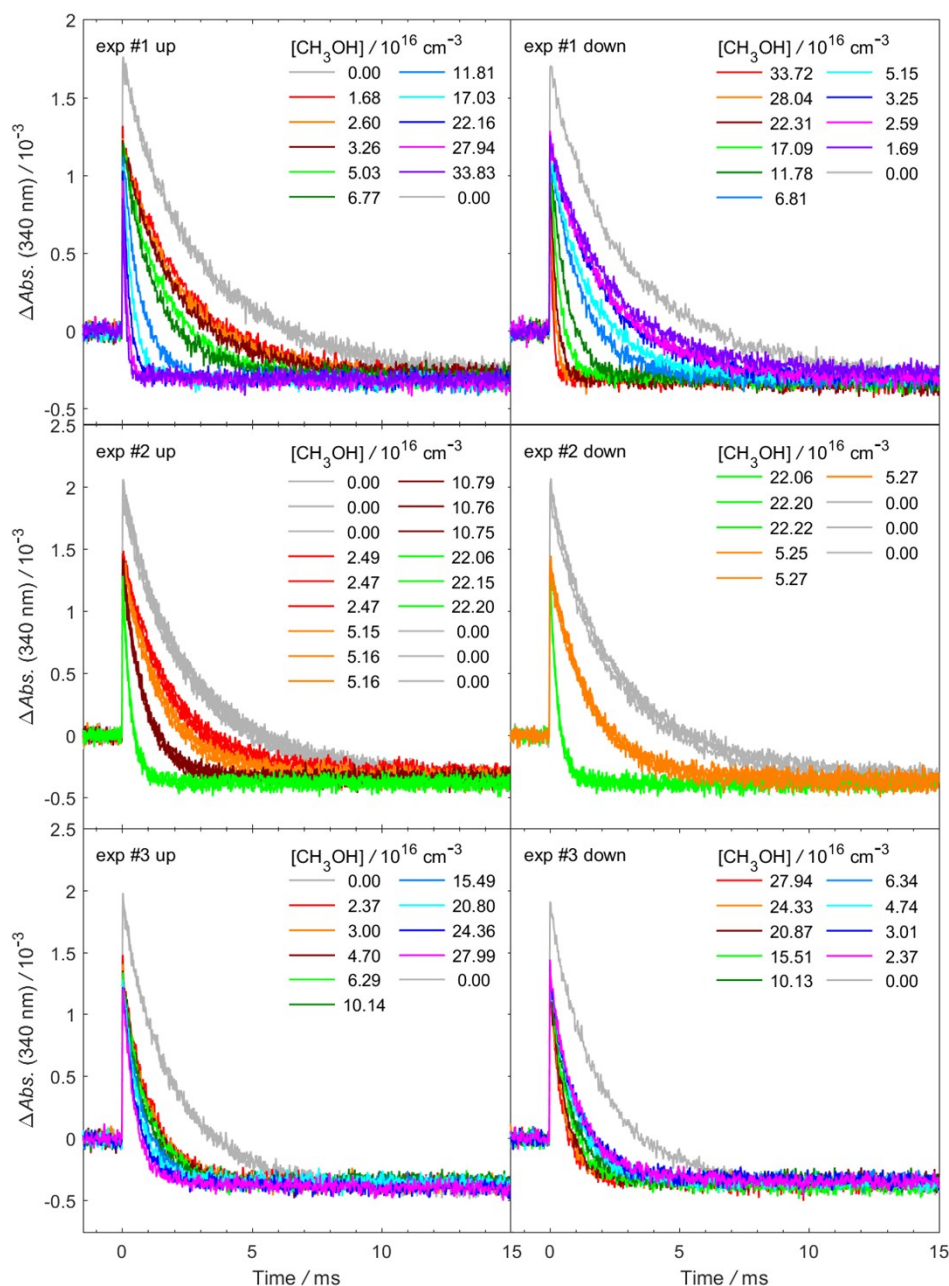

**Fig. S14.** Representative time traces of CH<sub>3</sub>CHOO at 340±5 nm under different [CH<sub>3</sub>OH] (exp# 1-3). The photolysis laser pulse sets the time zero. In each experiment, [CH<sub>3</sub>OH] was scanned from 0 to the maximum (labeled as “up”) and from the maximum to 0 (labeled as “down”). [CH<sub>3</sub>CHOO]<sub>0</sub> was determined by the traces when [CH<sub>3</sub>OH] = 0 cm<sup>-3</sup> (gray lines). At high [CH<sub>3</sub>OH], only the signal of *syn*-CH<sub>3</sub>CHOO was observed. The negative baseline was caused by the depletion of the precursor CH<sub>3</sub>CHI<sub>2</sub>.

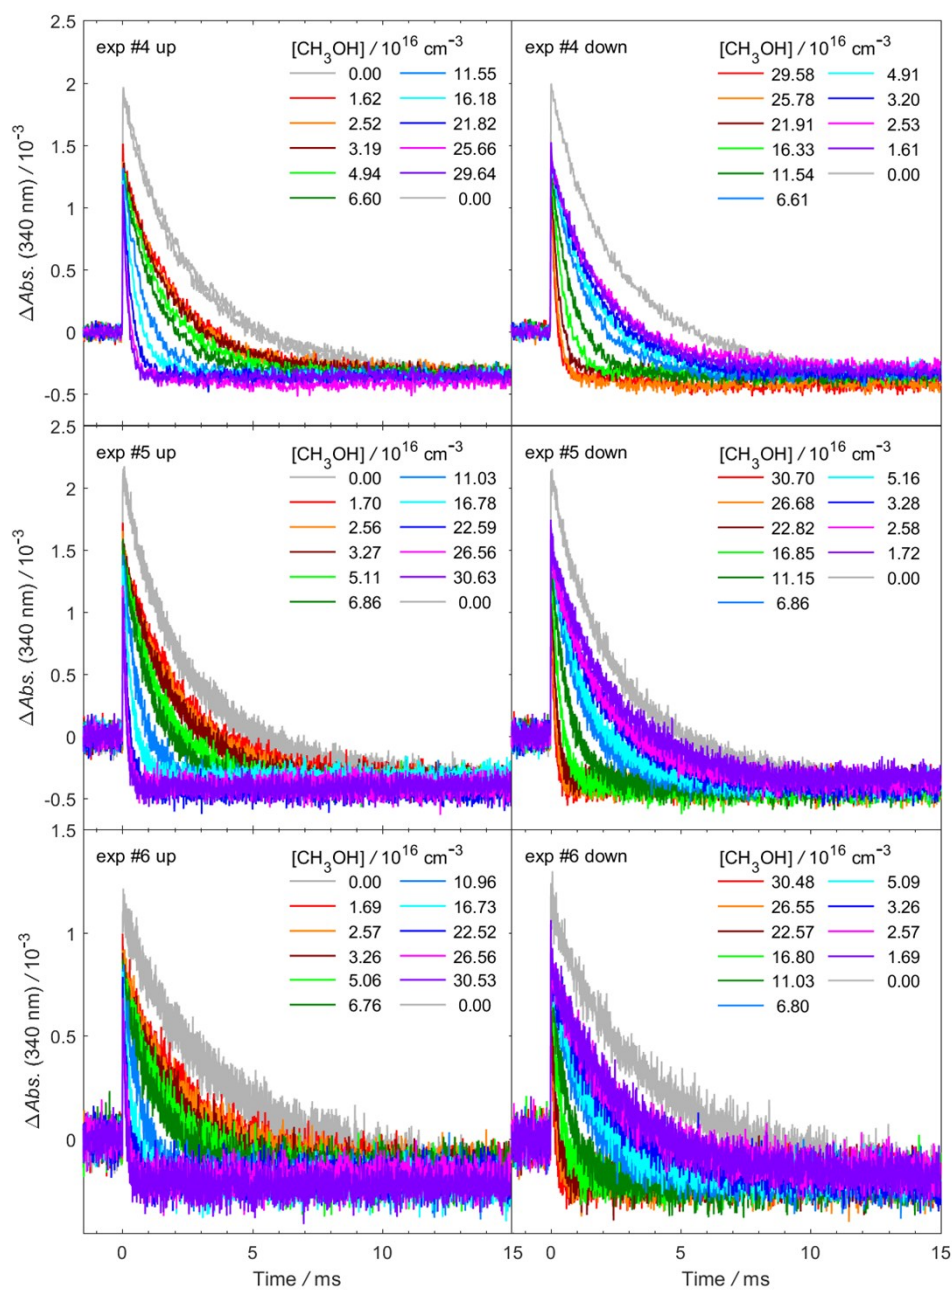

**Fig. S15.** As Fig. S14, but different experiment sets (exp# 4-6).

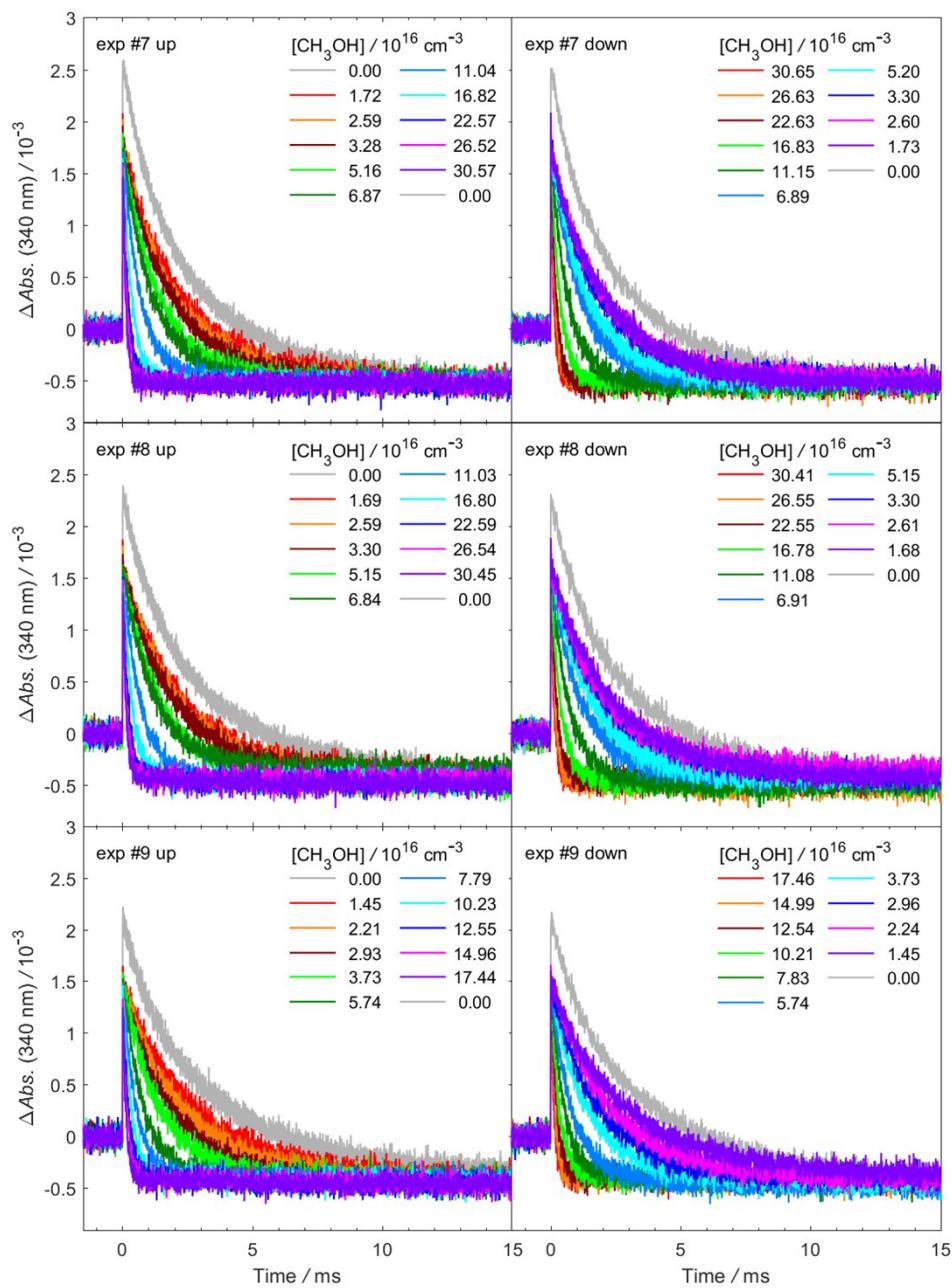

**Fig. S16.** As Fig. S14, but different experiment sets (exp# 7-9).

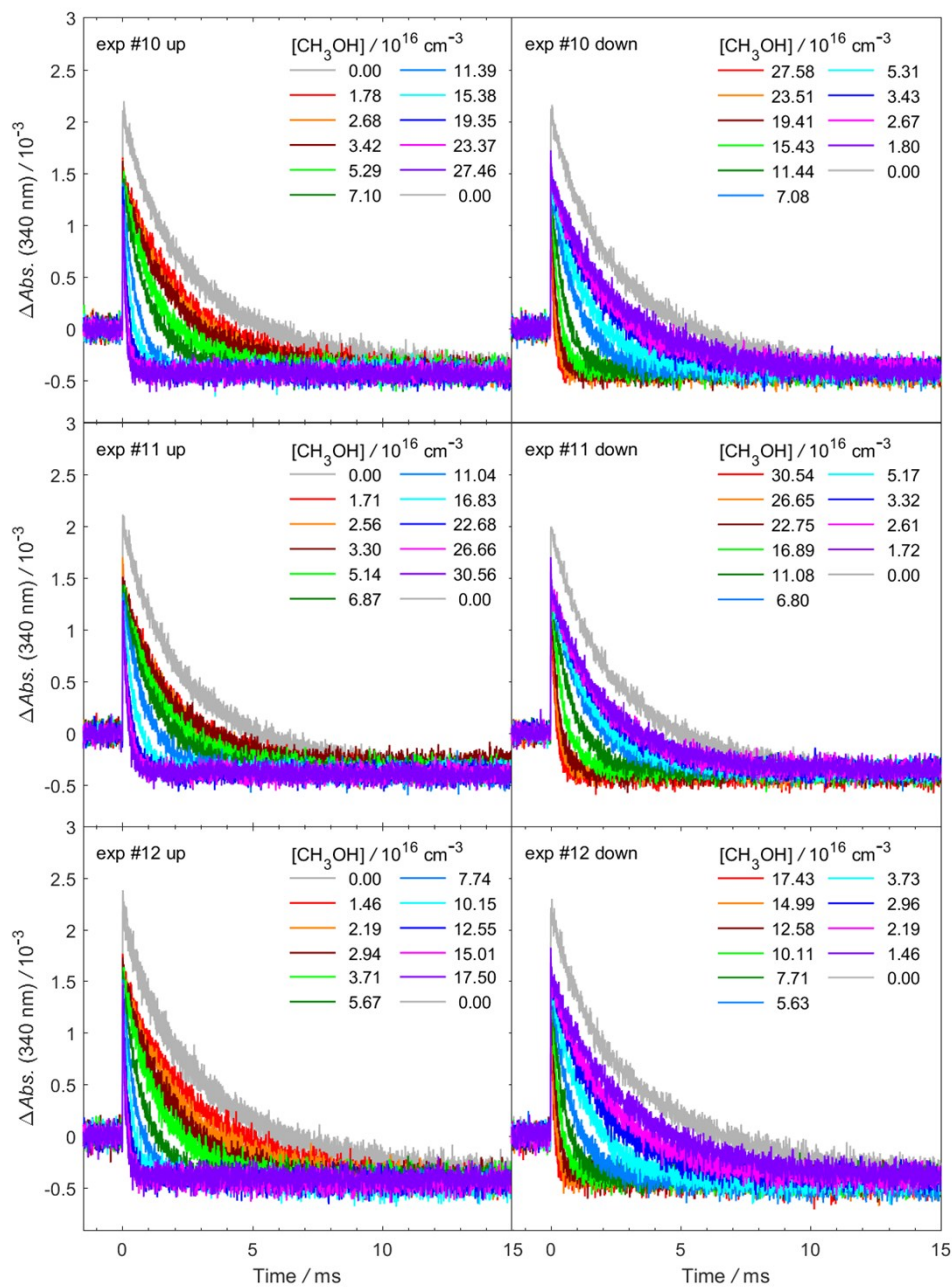

**Fig. S17.** As Fig. S14, but different experiment sets (exp# 10-12).

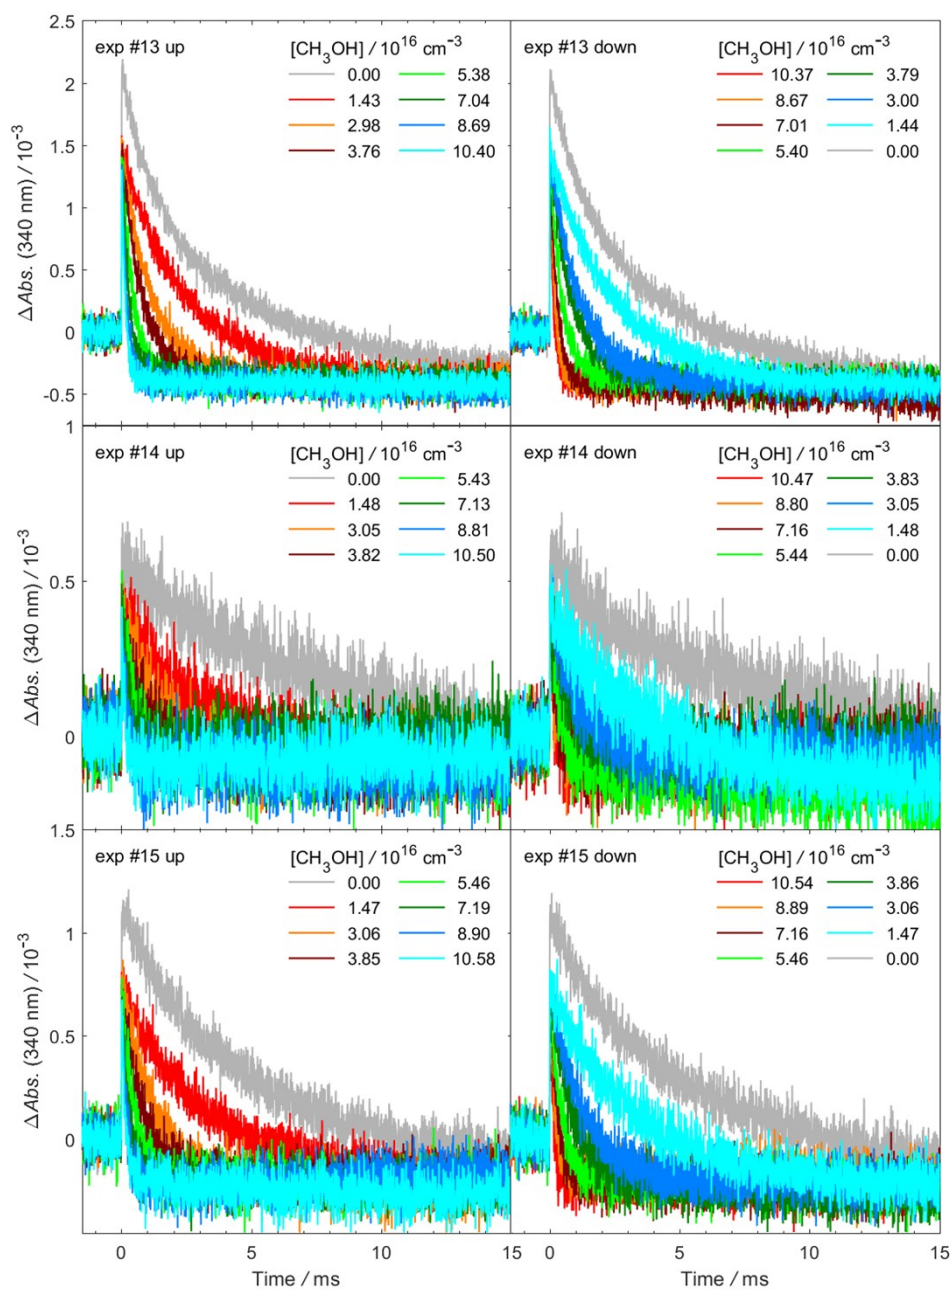

**Fig. S18.** As Fig. S14, but different experiment sets (exp# 13-15).

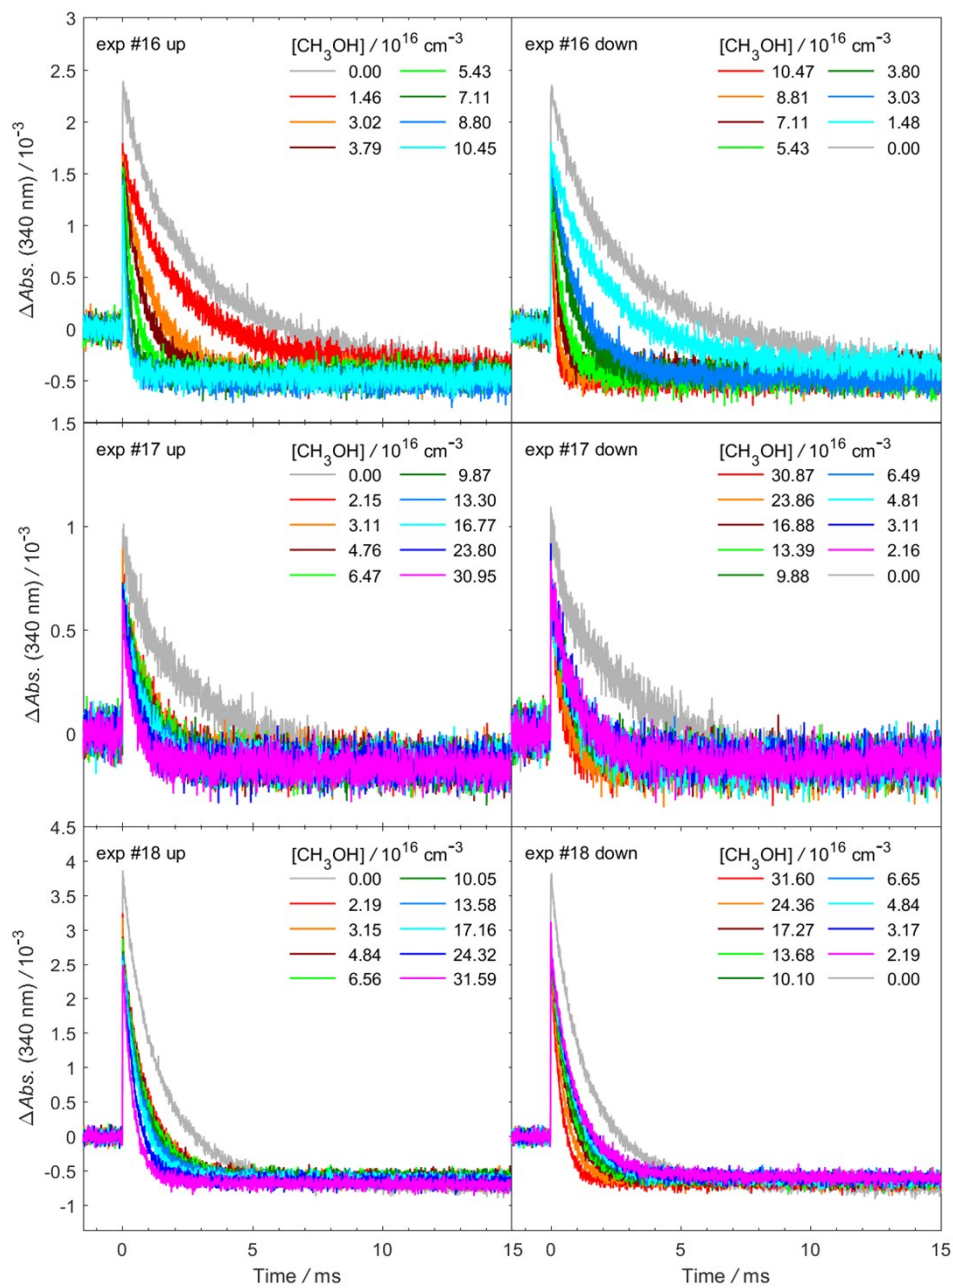

**Fig. S19.** As Fig. S14, but different experiment sets (exp# 16-18).

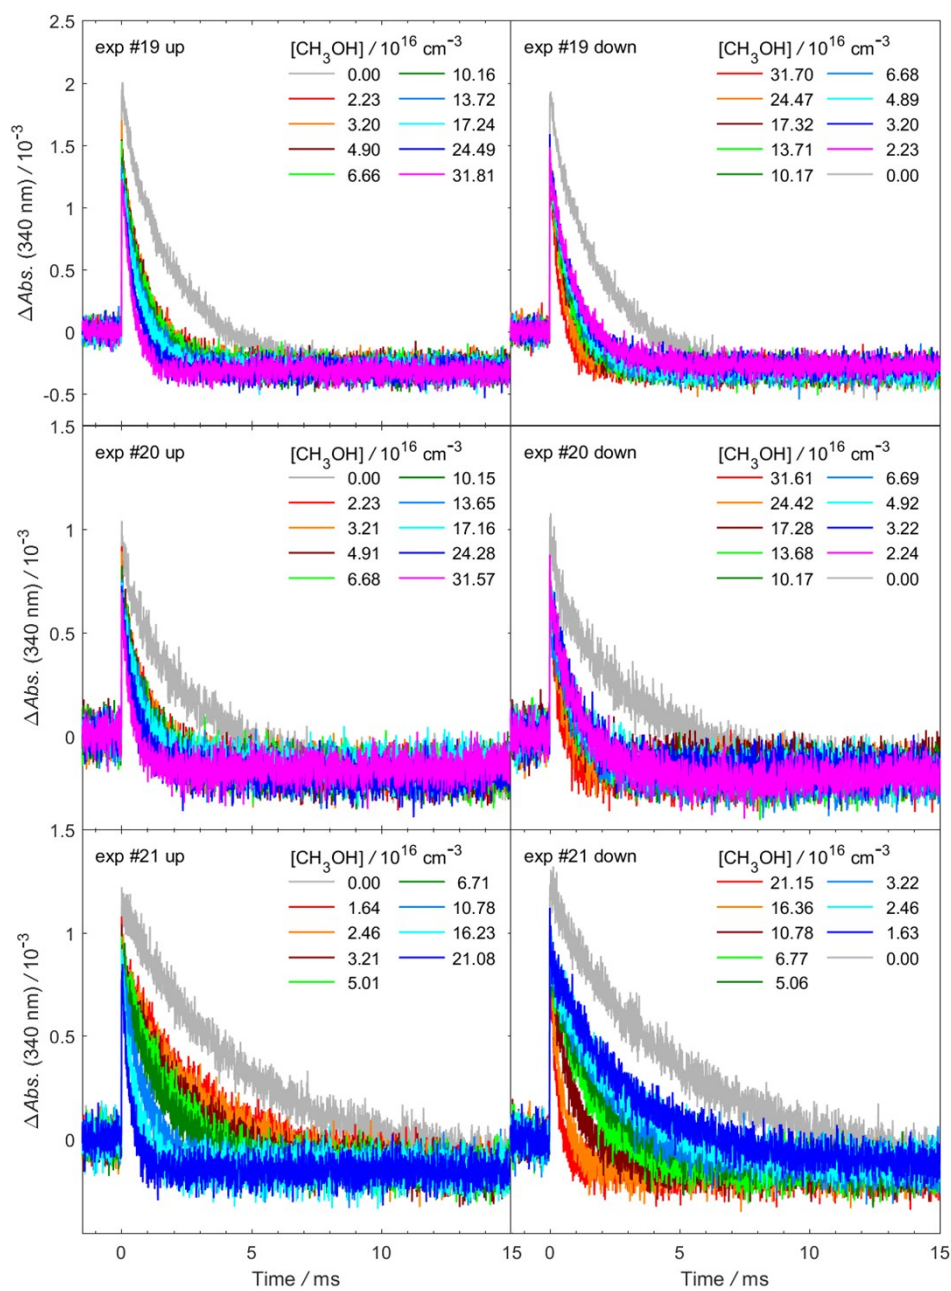

**Fig. S20.** As Fig. S14, but different experiment sets (exp# 19-21).

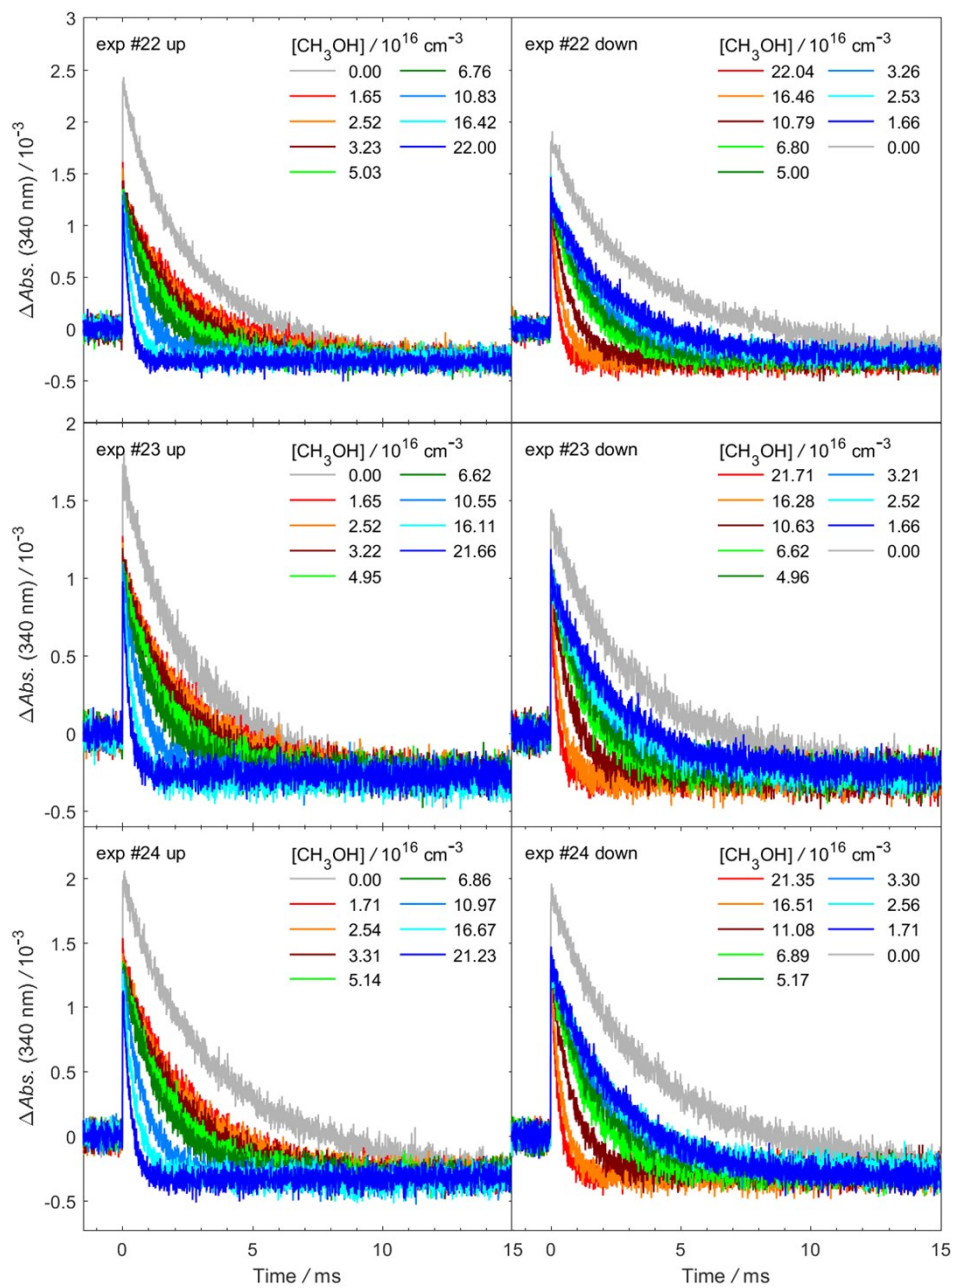

**Fig. S21.** As Fig. S14, but different experiment sets (exp# 22-24).

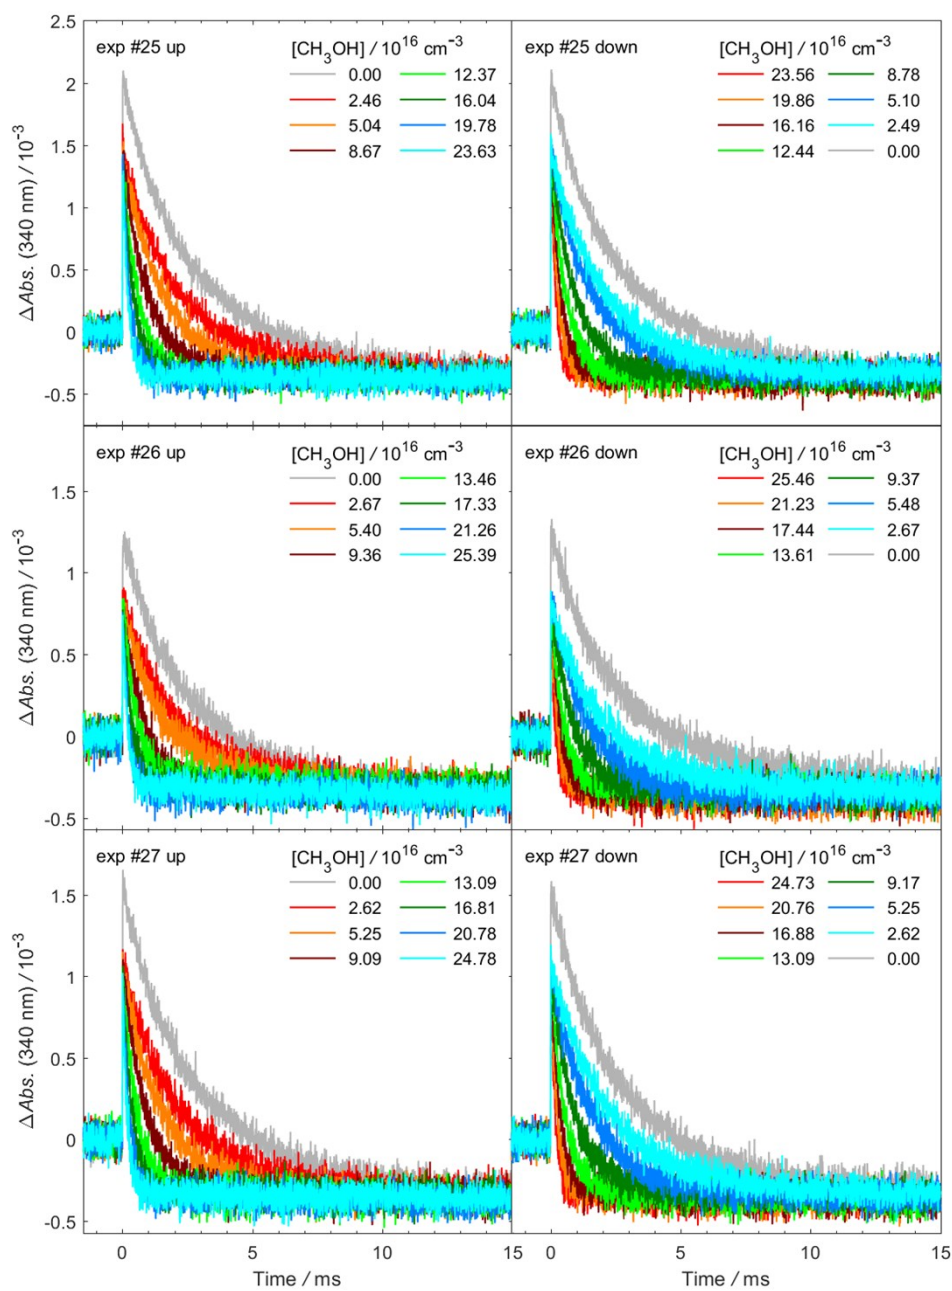

**Fig. S22.** As Fig. S14, but different experiment sets (exp# 25-27).

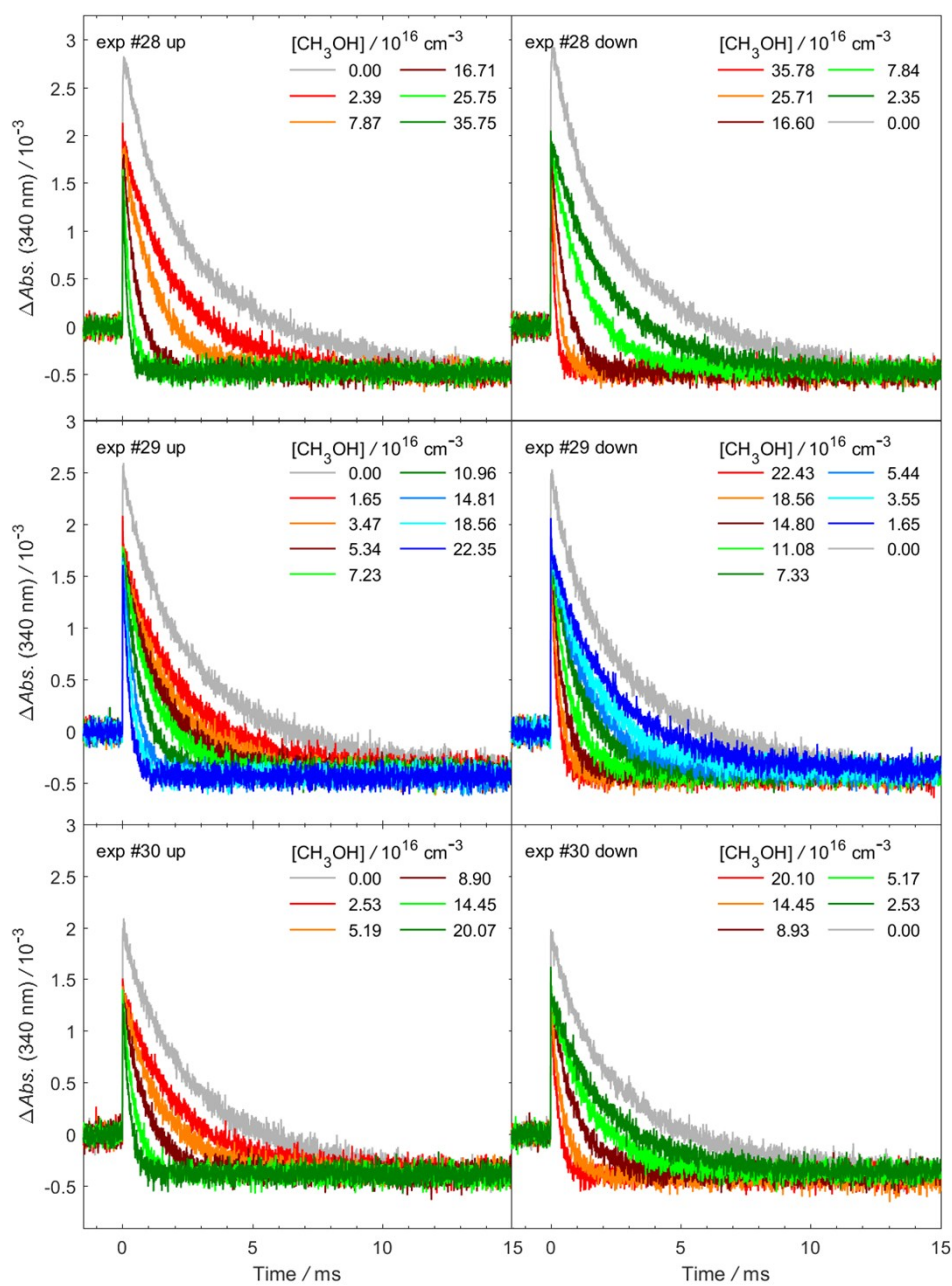

**Fig. S23.** As Fig. S14, but different experiment sets (exp# 28-30).

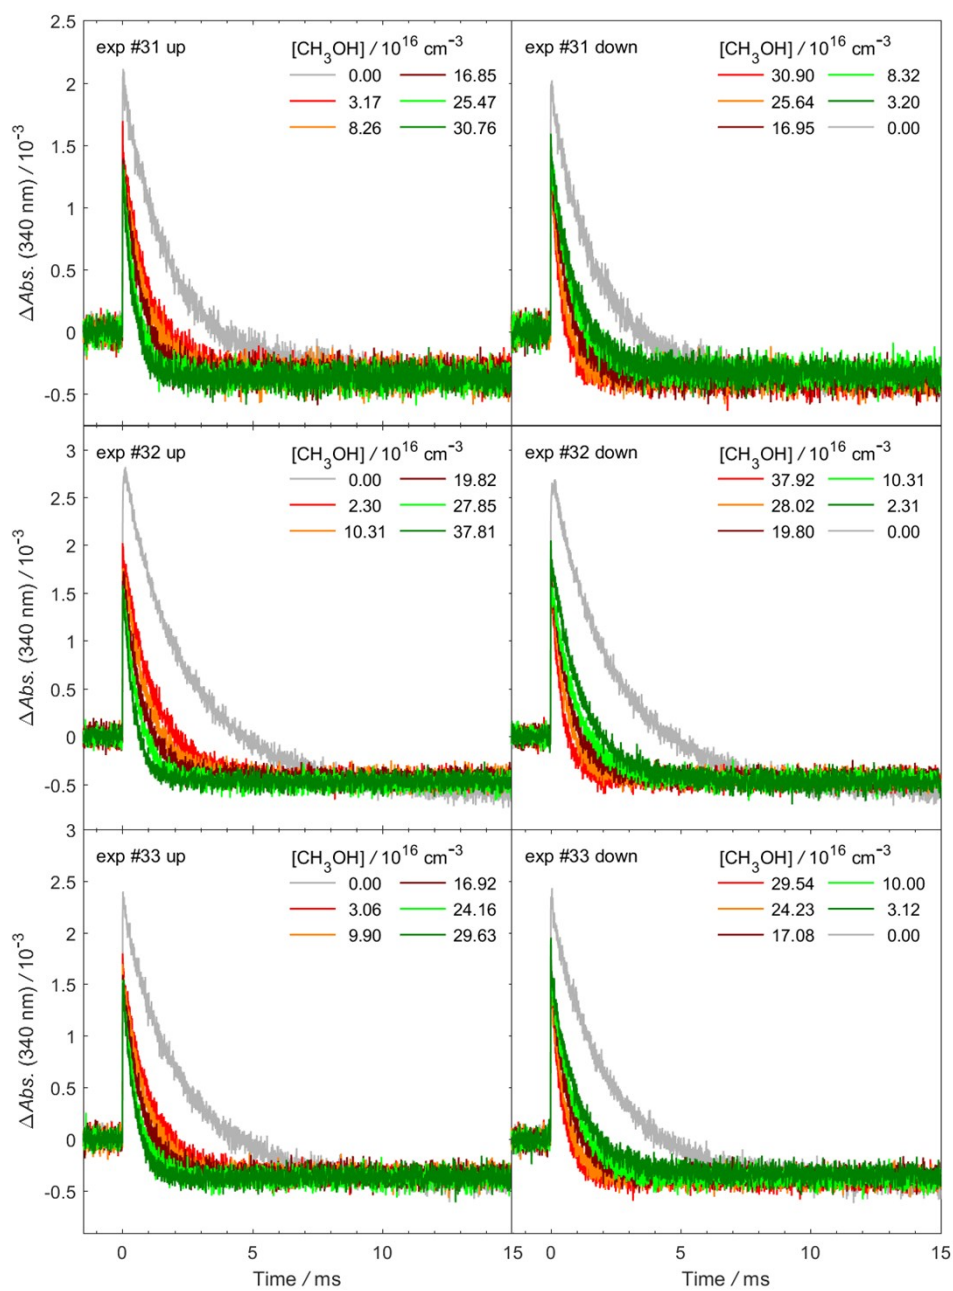

**Fig. S24.** As Fig. S14, but different experiment sets (exp# 31-33).

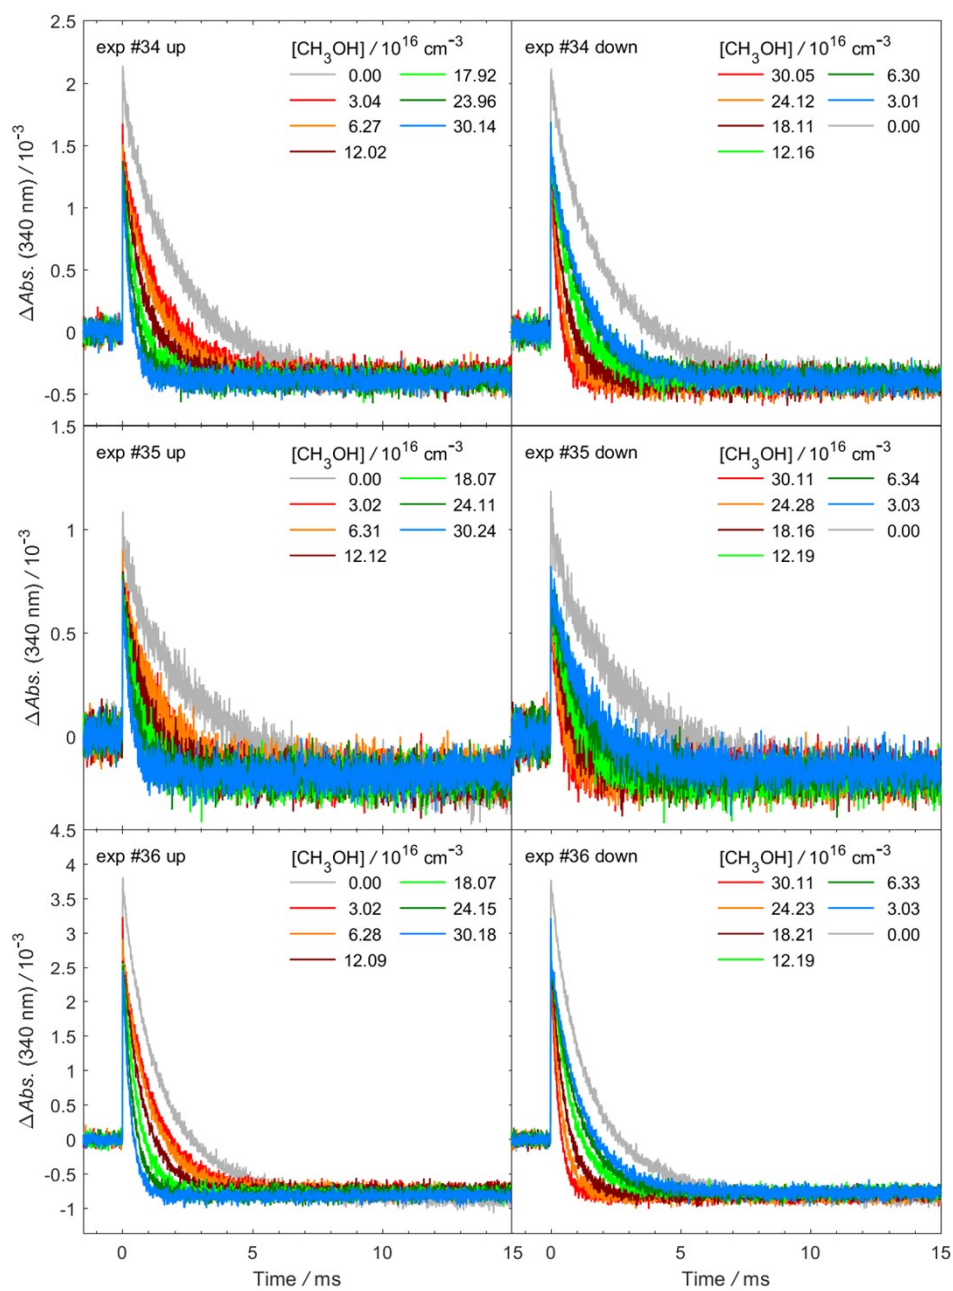

**Fig. S25.** As Fig. S14, but different experiment sets (exp# 34-36).

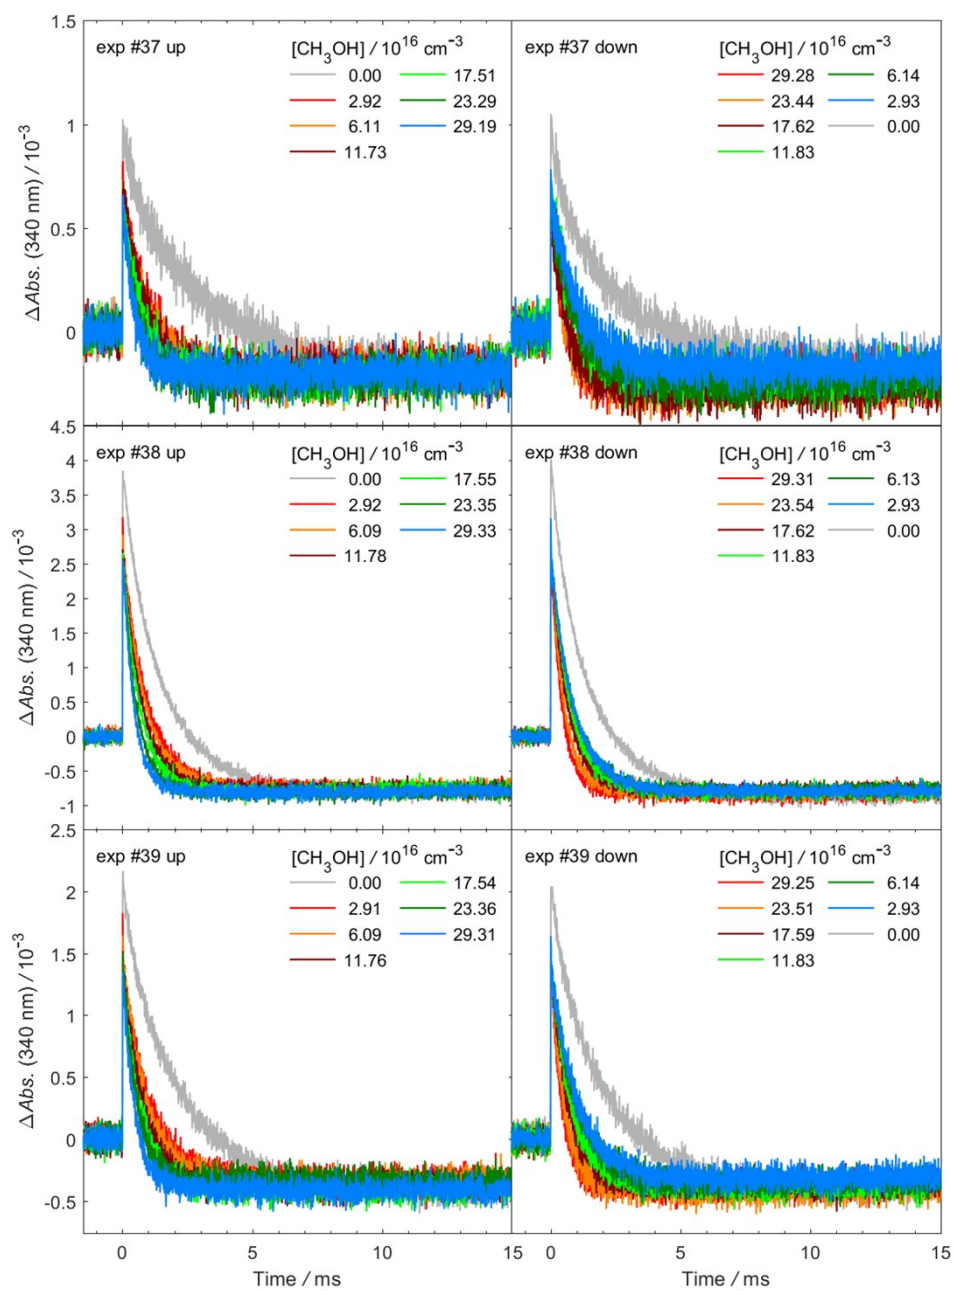

**Fig. S26.** As Fig. S14, but different experiment sets (exp# 37-39).

## Representative time traces for the reaction of *syn*-CH<sub>3</sub>CHOO with CH<sub>3</sub>OD vapor

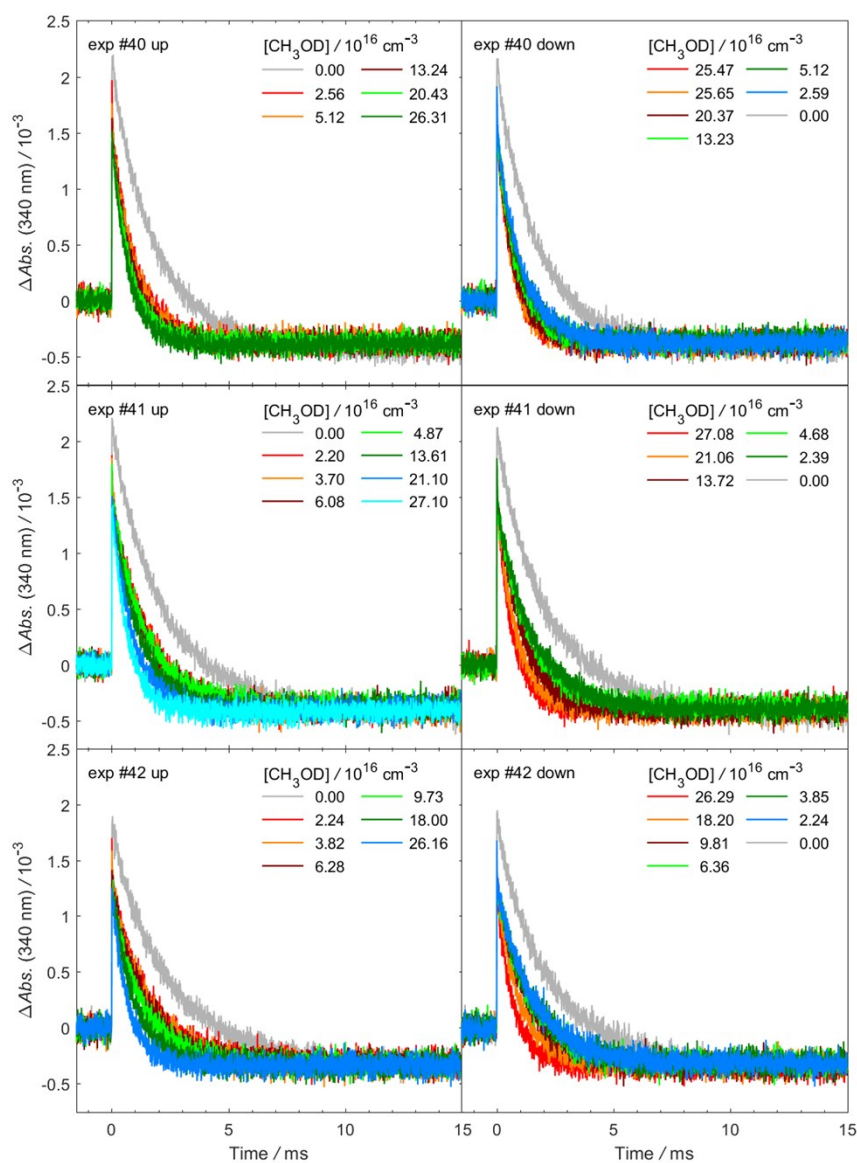

**Fig. S27.** Representative time traces of CH<sub>3</sub>CHOO at 340±5 nm under different [CH<sub>3</sub>OD] (exp# 40-42). The photolysis laser pulse sets the time zero. In each experiment, [CH<sub>3</sub>OD] was scanned from 0 to the maximum (labeled as “up”) and from the maximum to 0 (labeled as “down”). [CH<sub>3</sub>CHOO]<sub>0</sub> was determined by the traces when [CH<sub>3</sub>OD] = 0 cm<sup>-3</sup> (gray lines). At high [CH<sub>3</sub>OD], only the signal of *syn*-CH<sub>3</sub>CHOO was observed. The negative baseline was caused by the depletion of the precursor CH<sub>3</sub>CHI<sub>2</sub>.

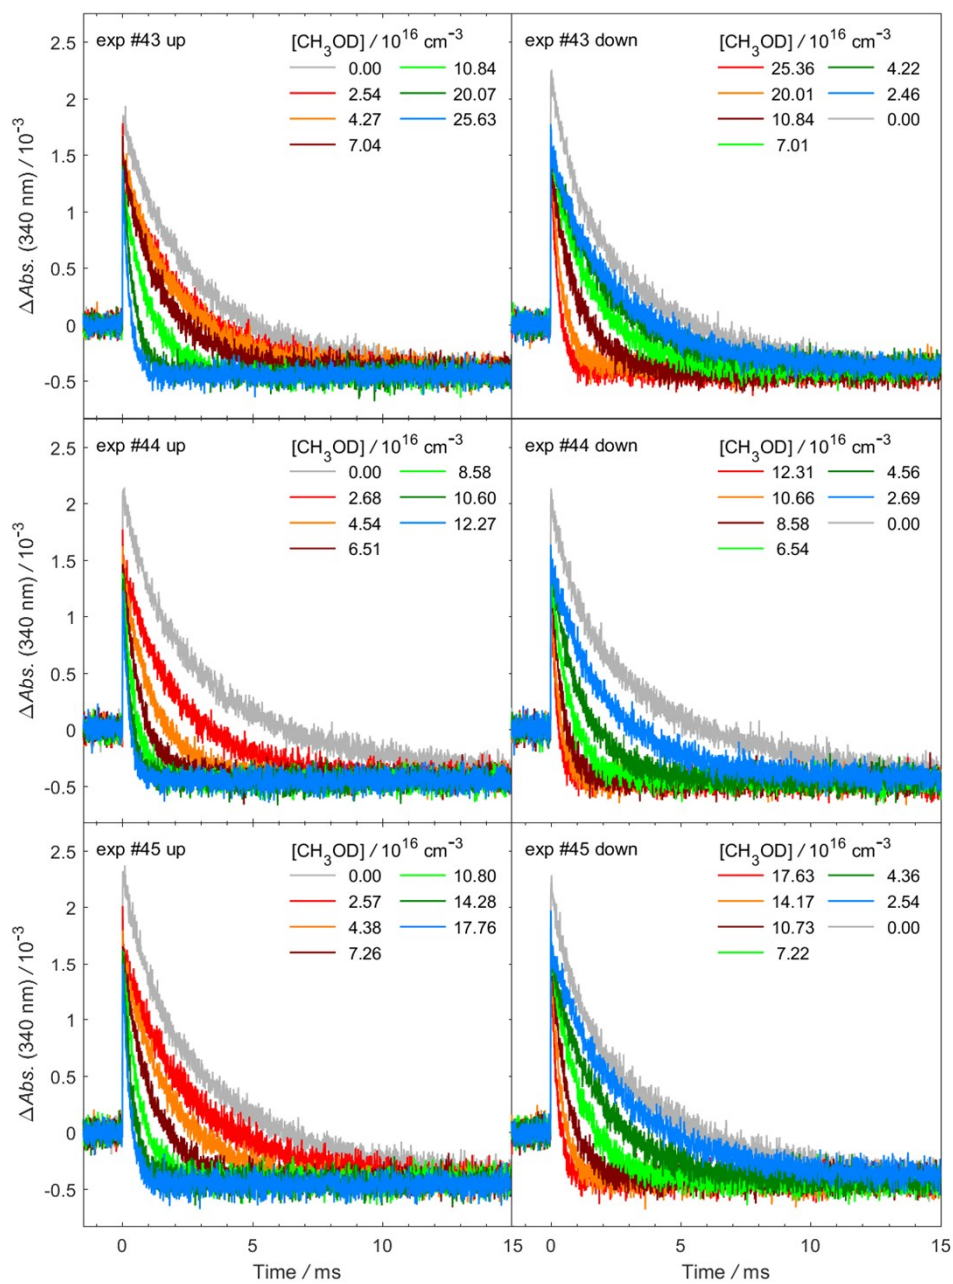

**Fig. S28.** As Fig. S27 but different experiment sets (exp# 43-45)..

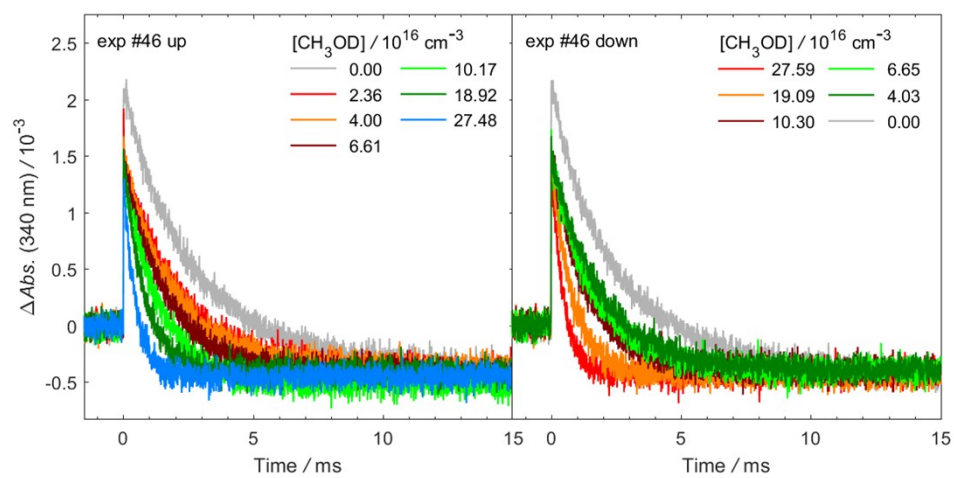

**Fig. S29.** As Fig. S27 but different experiment sets (exp# 46).

## Representative time traces for the reaction of *syn*-CD<sub>3</sub>CDOO with CH<sub>3</sub>OH vapor

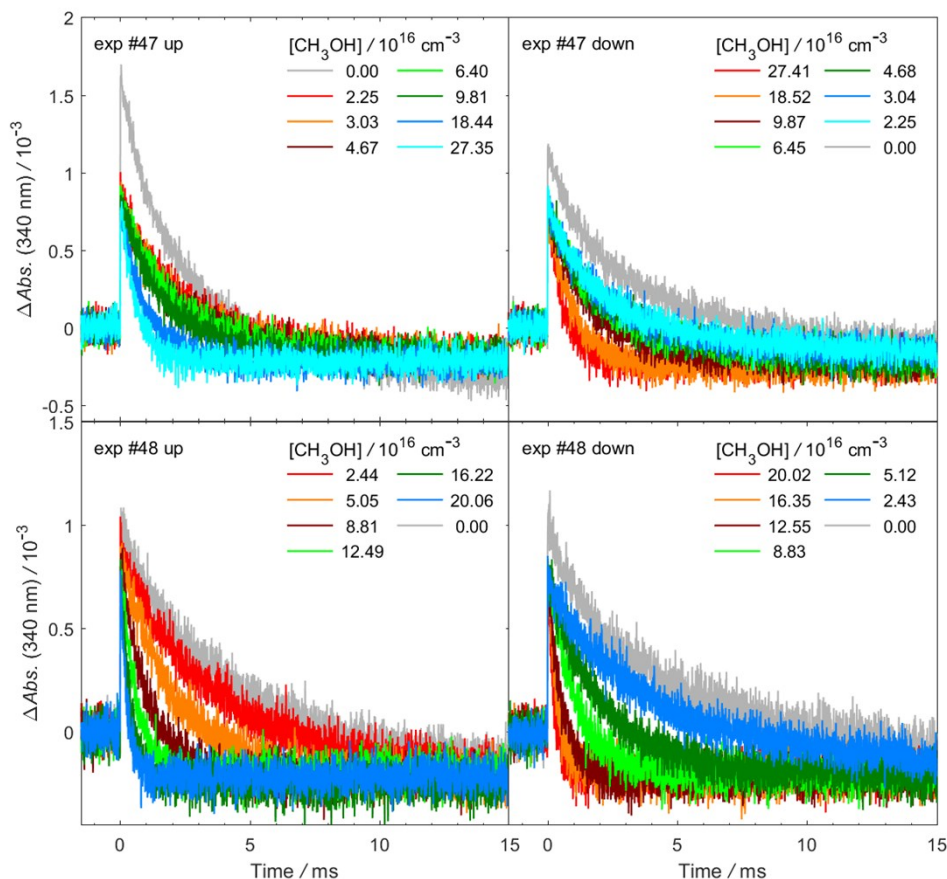

**Fig. S30.** Representative time traces of CD<sub>3</sub>CDOO at 340±5 nm under different [CH<sub>3</sub>OH] (exp# 47-48). The photolysis laser pulse sets the time zero. In each experiment, [CH<sub>3</sub>OH] was scanned from 0 to the maximum (labeled as “up”) and from the maximum to 0 (labeled as “down”). [CD<sub>3</sub>CDOO]<sub>0</sub> was determined by the traces when [CH<sub>3</sub>OH] = 0 cm<sup>-3</sup> (gray lines). At high [CH<sub>3</sub>OH], only the signal of *syn*-CD<sub>3</sub>CDOO was observed. The negative baseline was caused by the depletion of the precursor CD<sub>3</sub>CDI<sub>2</sub>.

## Representative time traces for the reaction of *anti*-CH<sub>3</sub>CHOO with CH<sub>3</sub>OH

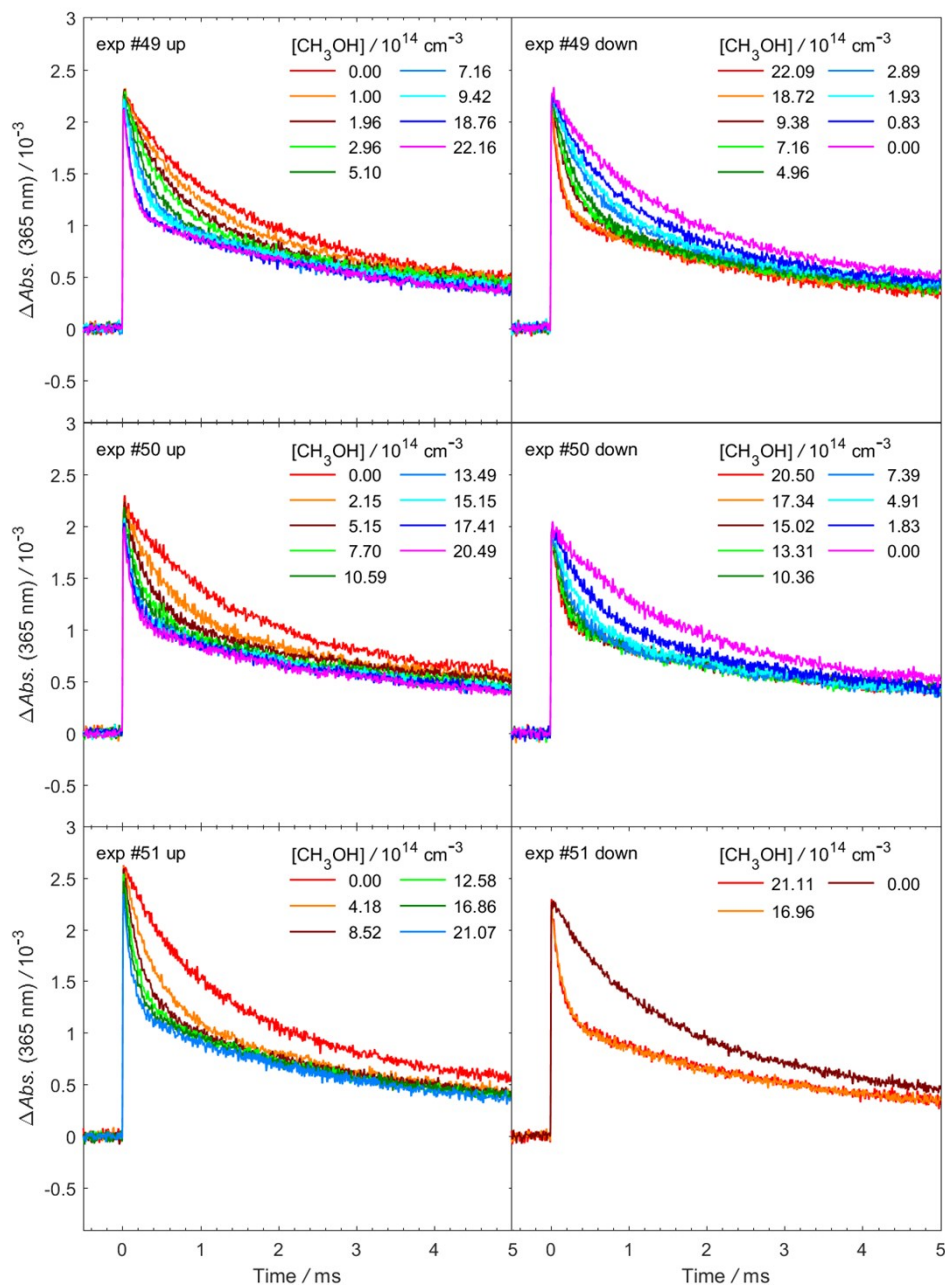

**Fig. S31.** Representative time traces of CH<sub>3</sub>CHOO at 365±5 nm under different [CH<sub>3</sub>OH] (exp# 49-51). The photolysis laser pulse sets the time zero. In each experiment, [CH<sub>3</sub>OH] was scanned from 0 to the maximum (labeled as “up”) and from the maximum to 0 (labeled as “down”). At low [CH<sub>3</sub>OH], the consumption of *syn*-CH<sub>3</sub>CHOO by CH<sub>3</sub>OH is negligible.

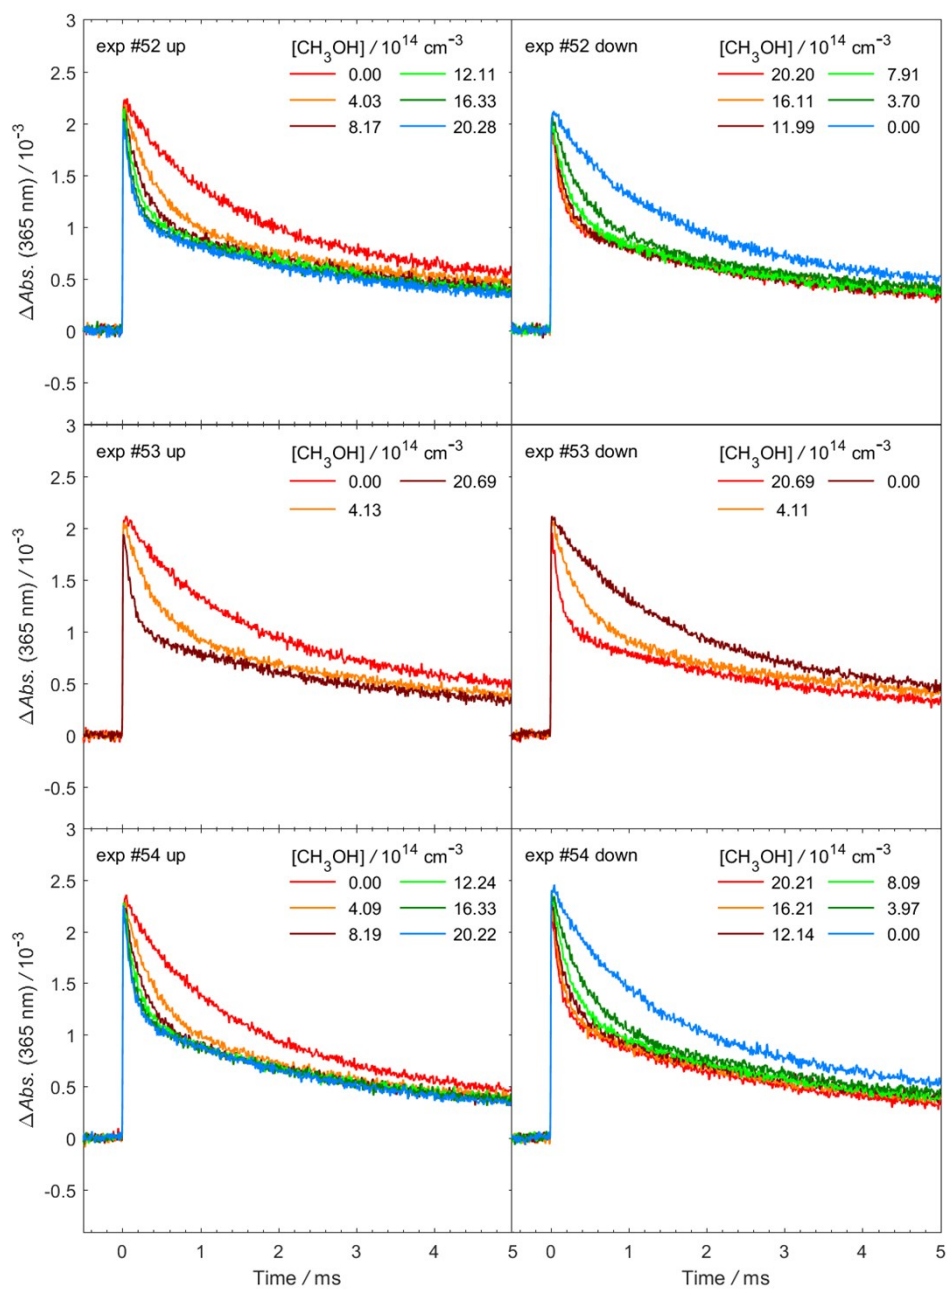

**Fig. S32.** As Fig. S31 but different experiment sets (exp# 52-54).

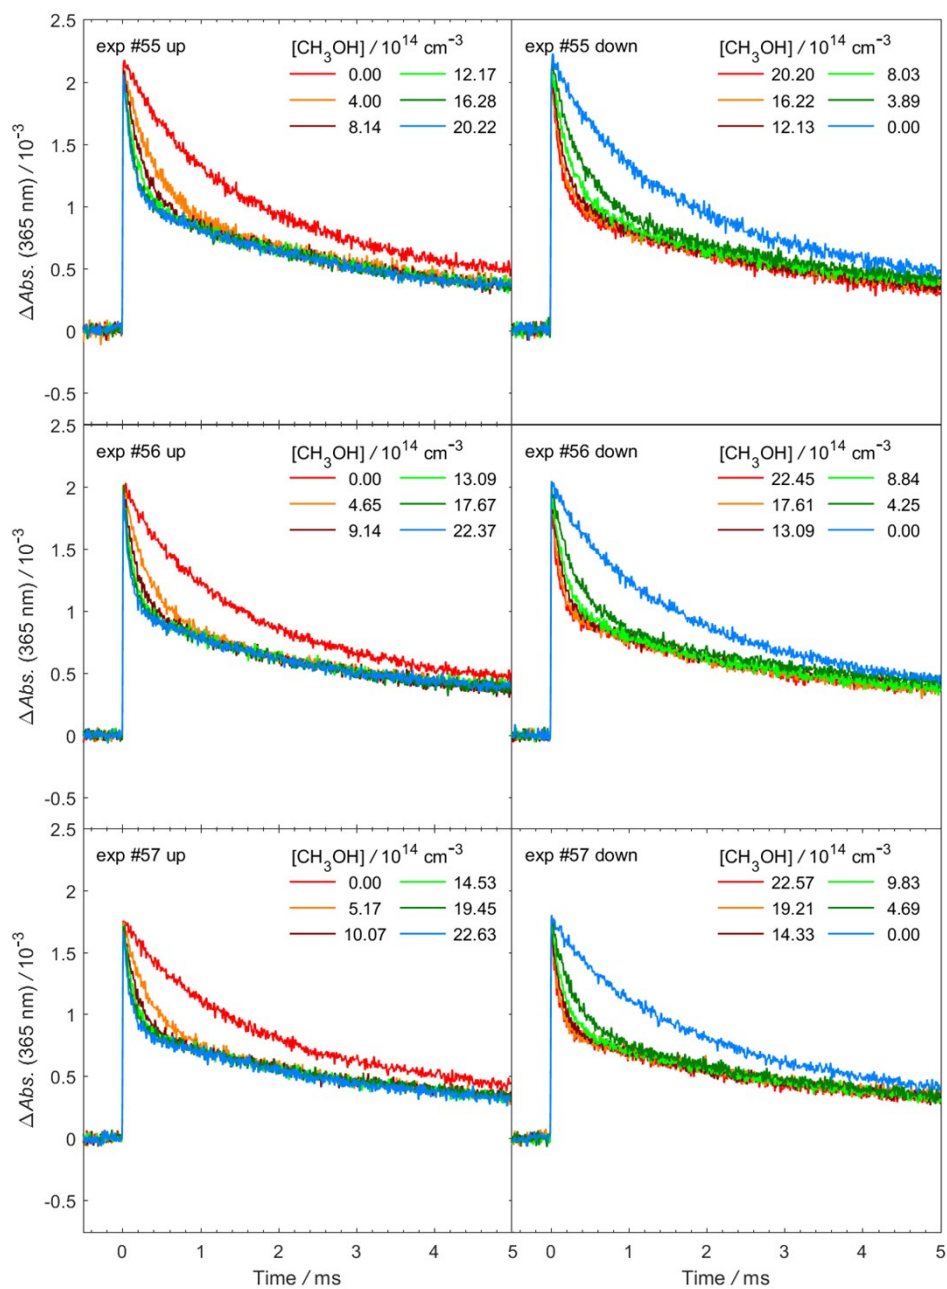

**Fig. S33.** As Fig. S31 but different experiment sets (exp# 55-57).

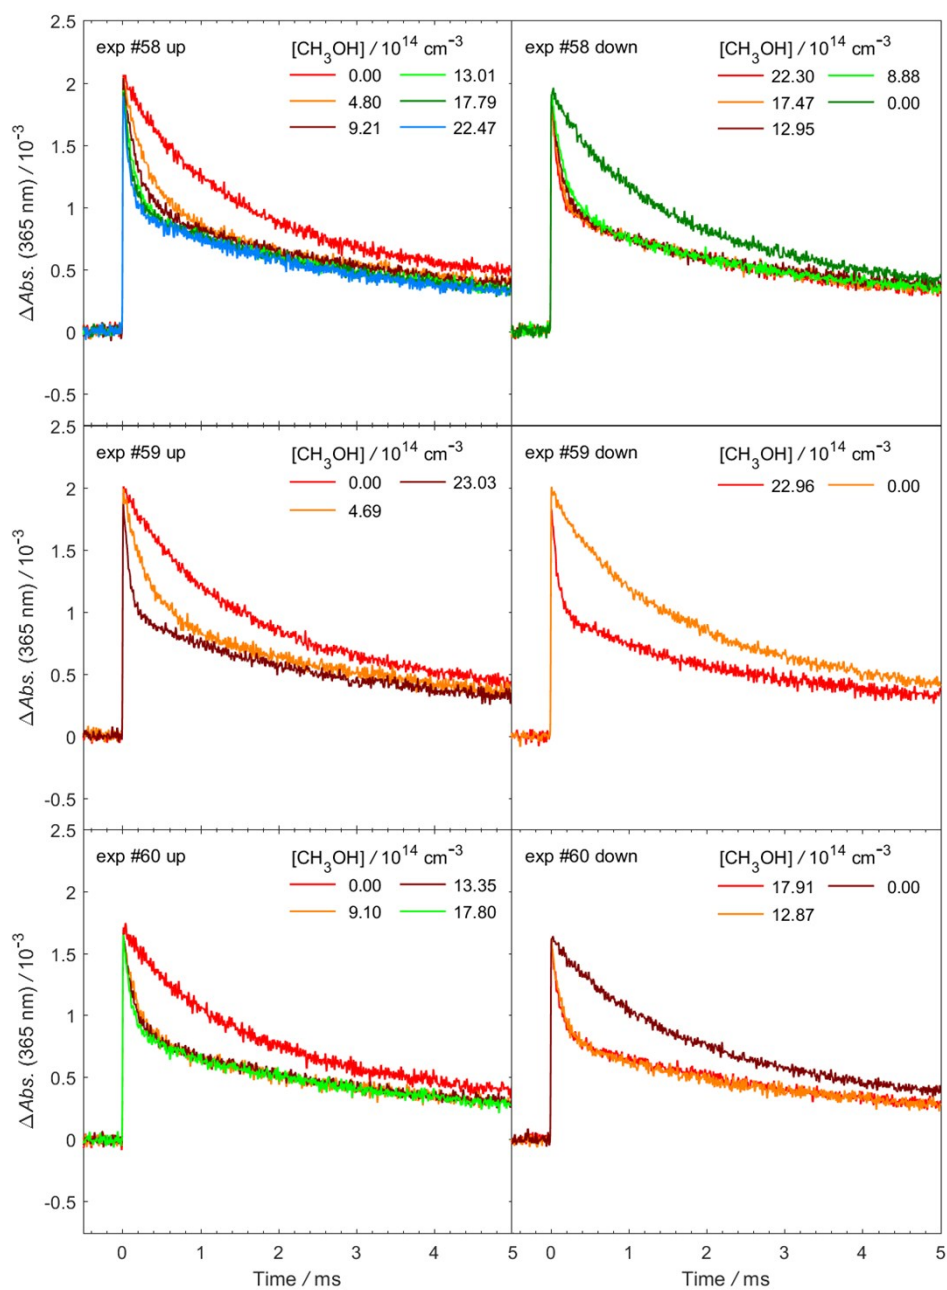

**Fig. S34.** As Fig. S31 but different experiment sets (exp# 58-60).

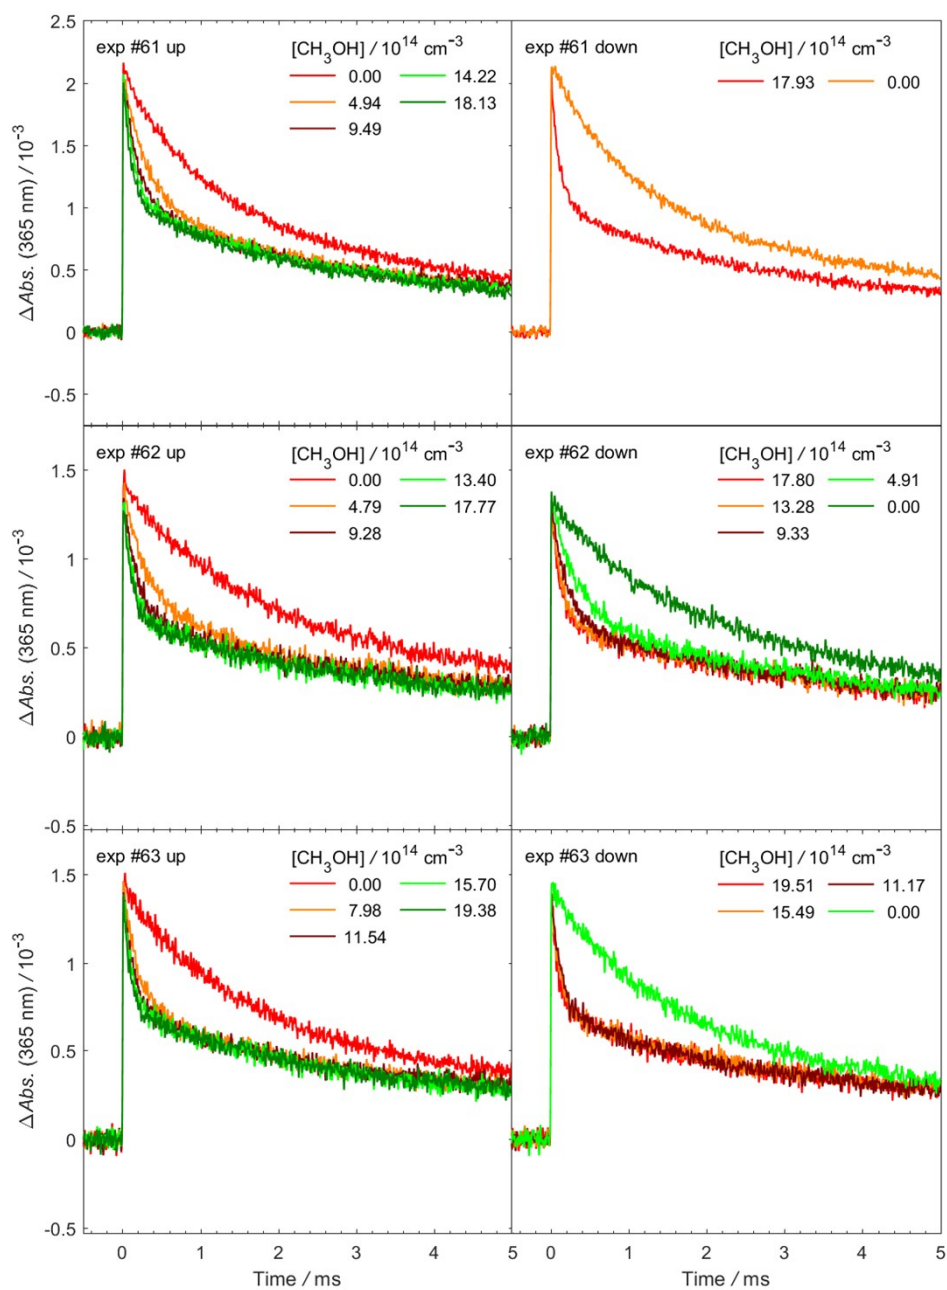

**Fig. S35.** As Fig. S31 but different experiment sets (exp# 61-63).

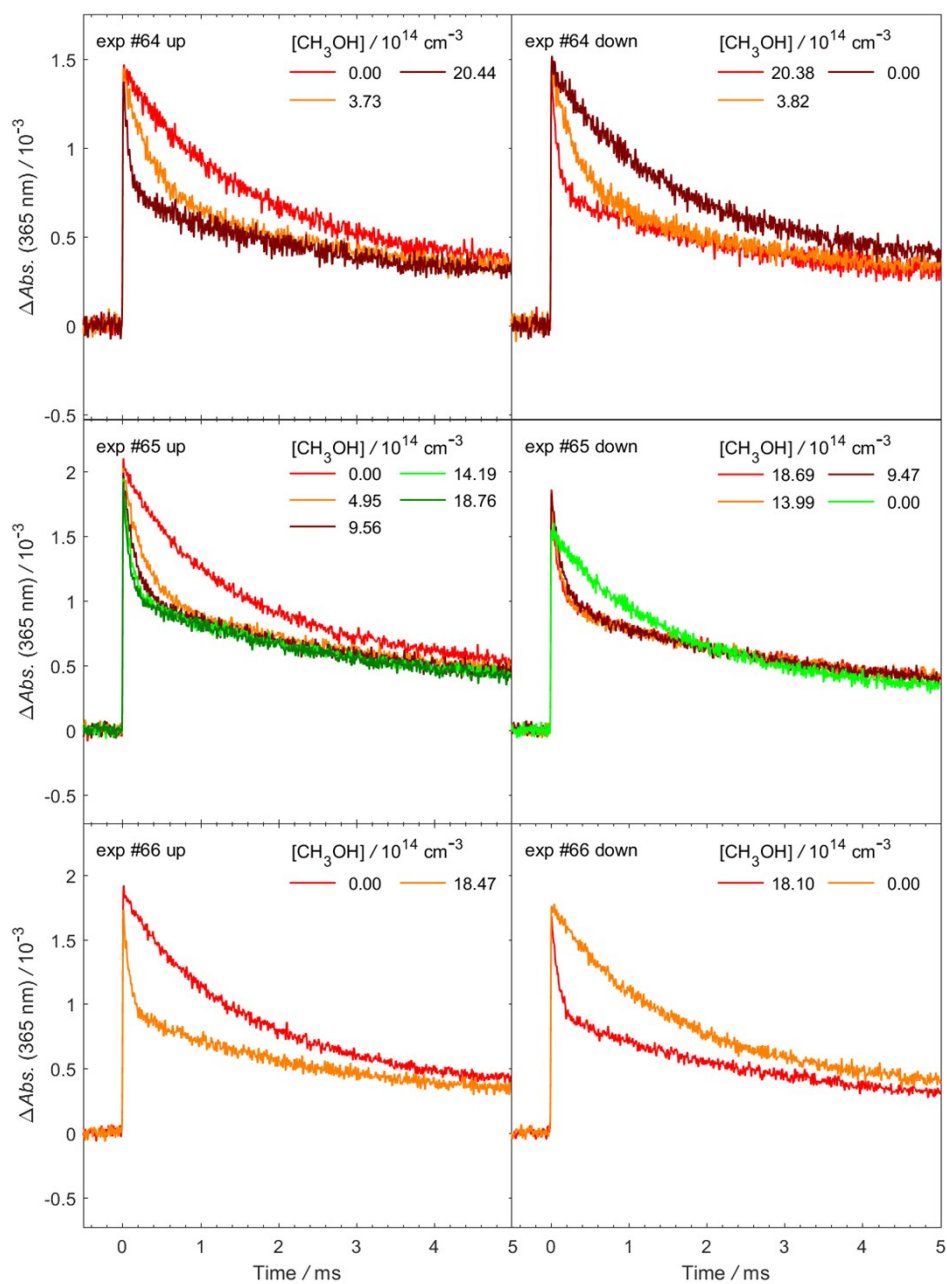

**Fig. S36.** As Fig. S31 but different experiment sets (exp# 64-66).

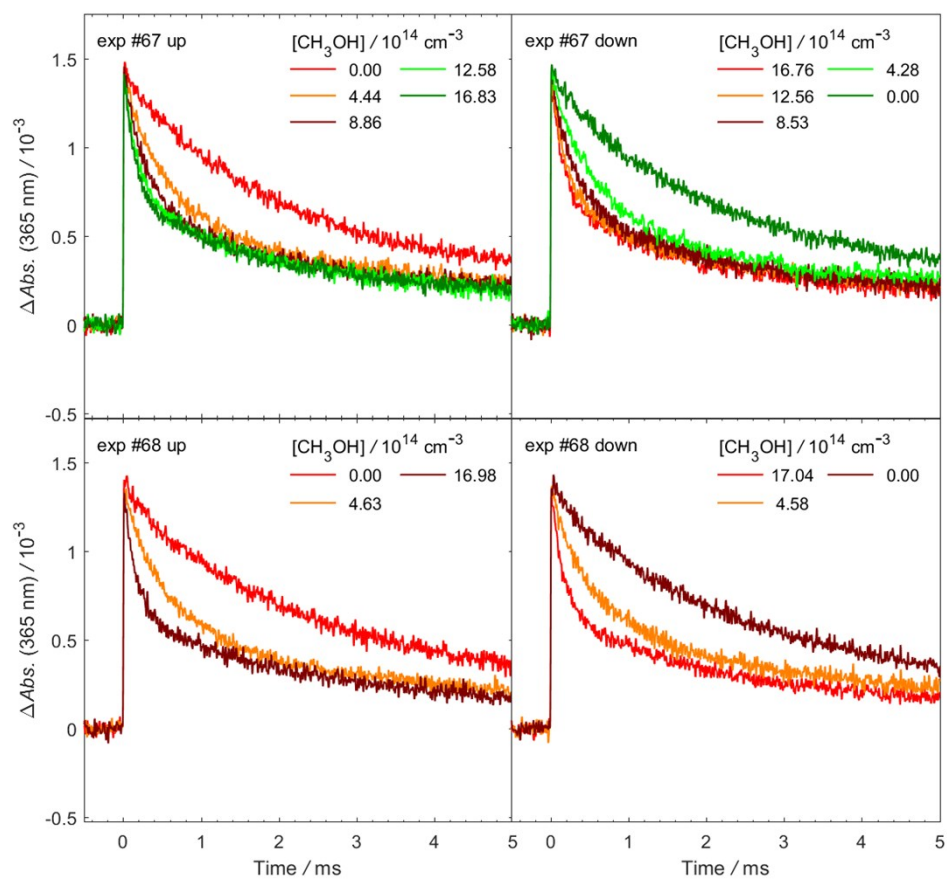

**Fig. S37.** As Fig. S31 but different experiment sets (exp# 67-68).

**Table S11.** XYZ geometries (in Ångström) for the reactants (*syn*-CH<sub>3</sub>CHOO, CH<sub>3</sub>OH) and the transition states, optimized at B3LYP/6-311+G(2d,2p).

| CH <sub>3</sub> OH | X       | Y       | Z       |
|--------------------|---------|---------|---------|
| O                  | -0.7493 | 0.1219  | 0.0000  |
| H                  | -1.1494 | -0.7506 | 0.0000  |
| C                  | 0.6679  | -0.0205 | 0.0000  |
| H                  | 1.0270  | -0.5433 | -0.8908 |
| H                  | 1.0824  | 0.9848  | 0.0000  |
| H                  | 1.0270  | -0.5433 | 0.8908  |

| <i>syn</i> -CH <sub>3</sub> CHOO | X       | Y       | Z       |
|----------------------------------|---------|---------|---------|
| C                                | -0.6075 | -0.6308 | -0.1819 |
| O                                | 0.6285  | -0.6348 | 0.0717  |
| H                                | -1.0046 | -1.6231 | -0.3575 |
| C                                | -1.3886 | 0.6100  | -0.2249 |
| H                                | -2.4312 | 0.4147  | -0.4578 |
| H                                | -1.2902 | 1.1287  | 0.7335  |
| H                                | -0.9424 | 1.2890  | -0.9577 |
| O                                | 1.2247  | 0.5731  | 0.3086  |

| <i>syn</i> -CH <sub>3</sub> CHOO+2CH <sub>3</sub> OH (2a) | X       | Y       | Z       |
|-----------------------------------------------------------|---------|---------|---------|
| C                                                         | 1.4253  | -0.4191 | 0.0949  |
| H                                                         | 2.3985  | 0.0487  | -0.0239 |
| O                                                         | 0.9777  | -0.8081 | -1.0565 |
| O                                                         | -0.2488 | -1.5918 | -0.9654 |
| O                                                         | 0.5433  | 1.1367  | 0.5274  |
| H                                                         | -0.4538 | 0.8590  | 0.2561  |
| O                                                         | -1.6306 | 0.3454  | -0.3259 |
| H                                                         | -1.1451 | -0.5522 | -0.6767 |
| C                                                         | -2.7549 | 0.0360  | 0.4853  |
| H                                                         | -3.5754 | -0.3346 | -0.1318 |
| H                                                         | -2.5178 | -0.7214 | 1.2387  |
| H                                                         | -3.0869 | 0.9412  | 0.9936  |
| C                                                         | 0.9345  | 2.2201  | -0.3278 |
| H                                                         | 0.9567  | 1.9025  | -1.3711 |
| H                                                         | 0.2173  | 3.0310  | -0.2136 |

|   |        |         |         |
|---|--------|---------|---------|
| H | 1.9190 | 2.5651  | -0.0183 |
| C | 1.1857 | -1.1986 | 1.3452  |
| H | 1.6236 | -2.1882 | 1.2030  |
| H | 1.6615 | -0.7041 | 2.1878  |
| H | 0.1269 | -1.3352 | 1.5336  |

|                                                           |         |         |         |
|-----------------------------------------------------------|---------|---------|---------|
| <i>syn</i> -CH <sub>3</sub> CHOO+2CH <sub>3</sub> OH (2b) | X       | Y       | Z       |
| C                                                         | -1.2881 | -0.5351 | 0.5599  |
| H                                                         | -1.8438 | -0.3011 | 1.4618  |
| O                                                         | -0.3391 | -1.3726 | 0.8265  |
| O                                                         | 0.3592  | -1.8424 | -0.3654 |
| O                                                         | 1.5977  | 0.2554  | -0.5971 |
| H                                                         | 1.1619  | -0.7444 | -0.5539 |
| O                                                         | -0.4096 | 1.0958  | 0.5202  |
| H                                                         | 0.5301  | 0.8184  | 0.0384  |
| C                                                         | -0.9960 | 2.2380  | -0.1018 |
| H                                                         | -0.3357 | 3.0924  | 0.0478  |
| H                                                         | -1.1466 | 2.0876  | -1.1718 |
| H                                                         | -1.9515 | 2.4500  | 0.3762  |
| C                                                         | 2.8352  | 0.2953  | 0.1067  |
| H                                                         | 2.7383  | -0.1173 | 1.1140  |
| H                                                         | 3.5907  | -0.2759 | -0.4344 |
| H                                                         | 3.1695  | 1.3303  | 0.1785  |
| C                                                         | -2.0340 | -0.5875 | -0.7318 |
| H                                                         | -2.5089 | -1.5693 | -0.7844 |
| H                                                         | -2.8056 | 0.1777  | -0.7622 |
| H                                                         | -1.3666 | -0.5034 | -1.5822 |

|                                                           |         |         |         |
|-----------------------------------------------------------|---------|---------|---------|
| <i>syn</i> -CH <sub>3</sub> CHOO+2CH <sub>3</sub> OH (2c) | X       | Y       | Z       |
| C                                                         | 1.4866  | -0.3363 | -0.2709 |
| H                                                         | 2.2851  | -0.0142 | -0.9316 |
| O                                                         | 0.8717  | -1.3529 | -0.7843 |
| O                                                         | -0.1319 | -1.9233 | 0.1080  |
| O                                                         | 0.3832  | 1.0726  | -0.6796 |
| H                                                         | -0.6117 | 0.6364  | -0.5672 |
| O                                                         | -1.7239 | -0.1539 | -0.4619 |
| H                                                         | -1.1341 | -1.0397 | -0.2030 |

|   |         |         |         |
|---|---------|---------|---------|
| C | -2.6825 | 0.1217  | 0.5482  |
| H | -3.4728 | -0.6309 | 0.5316  |
| H | -2.2354 | 0.1294  | 1.5479  |
| H | -3.1342 | 1.0958  | 0.3588  |
| C | 0.5040  | 2.3323  | -0.0238 |
| H | -0.1984 | 3.0299  | -0.4804 |
| H | 0.2960  | 2.2615  | 1.0455  |
| H | 1.5138  | 2.7124  | -0.1718 |
| C | 1.7143  | -0.2247 | 1.2007  |
| H | 2.3287  | -1.0788 | 1.4927  |
| H | 2.2517  | 0.6894  | 1.4406  |
| H | 0.7843  | -0.2888 | 1.7540  |

| <i>syn</i> -CH <sub>3</sub> CHOO+2CH <sub>3</sub> OH (2d) | X       | Y       | Z       |
|-----------------------------------------------------------|---------|---------|---------|
| C                                                         | 1.5087  | 0.0413  | -0.1652 |
| H                                                         | 2.1839  | 0.7970  | -0.5562 |
| O                                                         | 0.9285  | -0.5816 | -1.1426 |
| O                                                         | 0.1475  | -1.7354 | -0.7126 |
| O                                                         | -1.4667 | -0.4754 | 0.6359  |
| H                                                         | -0.8486 | -1.1189 | 0.0131  |
| O                                                         | 0.2941  | 1.2454  | 0.5131  |
| H                                                         | -0.5513 | 0.5918  | 0.6151  |
| C                                                         | -0.0270 | 2.2573  | -0.4481 |
| H                                                         | -0.2268 | 1.8181  | -1.4269 |
| H                                                         | -0.9061 | 2.8014  | -0.1062 |
| H                                                         | 0.8117  | 2.9473  | -0.5163 |
| C                                                         | -2.7765 | -0.3272 | 0.1050  |
| H                                                         | -2.7586 | -0.0444 | -0.9515 |
| H                                                         | -3.3304 | -1.2627 | 0.2020  |
| H                                                         | -3.3043 | 0.4429  | 0.6682  |
| C                                                         | 1.9048  | -0.6523 | 1.0962  |
| H                                                         | 2.5774  | -1.4673 | 0.8240  |
| H                                                         | 2.4170  | 0.0444  | 1.7545  |
| H                                                         | 1.0494  | -1.0873 | 1.6015  |

| <i>syn</i> -CH <sub>3</sub> CHOO+CH <sub>3</sub> OH (1a) | X       | Y       | Z       |
|----------------------------------------------------------|---------|---------|---------|
| C                                                        | -0.6754 | 0.5397  | -0.6115 |
| H                                                        | -0.6593 | 0.8745  | -1.6462 |
| O                                                        | -1.4235 | -0.4990 | -0.4600 |
| O                                                        | -1.0168 | -1.1676 | 0.7779  |
| O                                                        | 0.9563  | -0.5225 | -0.4948 |
| H                                                        | 0.3228  | -1.0413 | 0.1960  |
| C                                                        | 2.1496  | -0.0838 | 0.1433  |
| H                                                        | 2.8256  | -0.9345 | 0.2462  |
| H                                                        | 2.6294  | 0.6693  | -0.4803 |
| H                                                        | 1.9579  | 0.3329  | 1.1339  |
| C                                                        | -0.4582 | 1.5622  | 0.4489  |
| H                                                        | 0.4442  | 2.1391  | 0.2595  |
| H                                                        | -1.3063 | 2.2517  | 0.3878  |
| H                                                        | -0.4380 | 1.1125  | 1.4345  |

| <i>syn</i> -CH <sub>3</sub> CHOO+CH <sub>3</sub> OH (1b) | X       | Y       | Z       |
|----------------------------------------------------------|---------|---------|---------|
| C                                                        | -0.6642 | -0.3603 | 0.6332  |
| H                                                        | -0.3942 | -0.8511 | 1.5667  |
| O                                                        | -0.5881 | 0.9223  | 0.7303  |
| O                                                        | -0.4958 | 1.4756  | -0.6171 |
| O                                                        | 0.9188  | -0.5429 | -0.5164 |
| H                                                        | 0.5038  | 0.3664  | -0.8589 |
| C                                                        | 2.1468  | -0.2385 | 0.1497  |
| H                                                        | 2.5289  | -1.1532 | 0.5981  |
| H                                                        | 2.8684  | 0.1348  | -0.5775 |
| H                                                        | 1.9979  | 0.5218  | 0.9189  |
| C                                                        | -1.5937 | -1.0807 | -0.2803 |
| H                                                        | -1.2357 | -2.0905 | -0.4626 |
| H                                                        | -2.5557 | -1.1457 | 0.2381  |
| H                                                        | -1.7266 | -0.5455 | -1.2127 |

| <i>syn</i> -CH <sub>3</sub> CHOO+CH <sub>3</sub> OH (1c) | X       | Y       | Z       |
|----------------------------------------------------------|---------|---------|---------|
| C                                                        | 1.3672  | 0.4674  | 0.5617  |
| O                                                        | 1.2208  | -0.8124 | 0.5430  |
| O                                                        | 0.5737  | -1.3398 | -0.6241 |
| H                                                        | 1.7788  | 0.7842  | 1.5160  |
| O                                                        | -1.3323 | 0.1594  | -0.5863 |
| H                                                        | -0.5620 | -0.6523 | -0.6187 |
| C                                                        | 0.9300  | 1.3628  | -0.4181 |
| H                                                        | -0.3639 | 1.0305  | -0.4231 |
| H                                                        | 1.1816  | 2.3992  | -0.2416 |
| H                                                        | 1.0502  | 1.0152  | -1.4421 |
| C                                                        | -2.2073 | 0.0524  | 0.5346  |
| H                                                        | -3.1134 | 0.6226  | 0.3363  |
| H                                                        | -2.4722 | -0.9915 | 0.6988  |
| H                                                        | -1.7360 | 0.4393  | 1.4442  |

| <i>syn</i> -CH <sub>3</sub> CHOO+CH <sub>3</sub> OH (1d) | X       | Y       | Z       |
|----------------------------------------------------------|---------|---------|---------|
| C                                                        | -1.6212 | 0.5377  | -0.2349 |
| O                                                        | -1.5844 | -0.7500 | -0.2369 |
| O                                                        | -0.4925 | -1.3323 | 0.4866  |
| H                                                        | -2.4096 | 0.8911  | -0.8933 |
| O                                                        | 1.2337  | 0.0050  | -0.5778 |
| H                                                        | 0.5417  | -0.7420 | -0.1048 |
| C                                                        | -0.7066 | 1.3904  | 0.3883  |
| H                                                        | 0.4064  | 0.9491  | -0.2268 |
| H                                                        | -0.9351 | 2.4443  | 0.3105  |
| H                                                        | -0.3637 | 1.0528  | 1.3639  |
| C                                                        | 2.4968  | 0.0474  | 0.0846  |
| H                                                        | 3.0031  | -0.9098 | -0.0365 |
| H                                                        | 3.1075  | 0.8267  | -0.3677 |
| H                                                        | 2.3824  | 0.2535  | 1.1526  |

| <i>anti</i> -CH <sub>3</sub> CHOO+CH <sub>3</sub> OH (a) | X       | Y       | Z       |
|----------------------------------------------------------|---------|---------|---------|
| C                                                        | -0.7438 | -0.2555 | 0.3539  |
| H                                                        | -0.2213 | -0.1886 | 1.3030  |
| O                                                        | -1.1841 | 0.8377  | -0.1481 |
| O                                                        | -0.1856 | 1.8665  | 0.1215  |
| O                                                        | 0.9984  | -0.1420 | -0.5618 |
| H                                                        | 0.7688  | 0.8891  | -0.3684 |
| C                                                        | 2.1402  | -0.5292 | 0.1910  |
| H                                                        | 2.0253  | -0.2941 | 1.2538  |
| H                                                        | 2.2927  | -1.6010 | 0.0735  |
| H                                                        | 3.0209  | -0.0046 | -0.1829 |
| C                                                        | -1.4202 | -1.5151 | -0.0436 |
| H                                                        | -0.7213 | -2.3460 | 0.0288  |
| H                                                        | -2.2446 | -1.7098 | 0.6469  |
| H                                                        | -1.8075 | -1.4445 | -1.0561 |

| <i>anti</i> -CH <sub>3</sub> CHOO+CH <sub>3</sub> OH (b) | X       | Y       | Z       |
|----------------------------------------------------------|---------|---------|---------|
| C                                                        | 0.8942  | -0.0196 | 0.3475  |
| H                                                        | 0.9361  | 0.2996  | 1.3820  |
| O                                                        | 0.7516  | 0.8931  | -0.5443 |
| O                                                        | -0.1568 | 1.8892  | 0.0127  |
| O                                                        | -1.0265 | -0.2844 | 0.6865  |
| H                                                        | -0.9529 | 0.7688  | 0.4978  |
| C                                                        | -1.7443 | -0.8772 | -0.3947 |
| H                                                        | -1.7187 | -1.9593 | -0.2791 |
| H                                                        | -2.7815 | -0.5403 | -0.3672 |
| H                                                        | -1.3139 | -0.5963 | -1.3587 |
| C                                                        | 1.5396  | -1.2918 | -0.0631 |
| H                                                        | 2.6182  | -1.2034 | 0.0873  |
| H                                                        | 1.1825  | -2.1024 | 0.5692  |
| H                                                        | 1.3468  | -1.5171 | -1.1088 |

## Reference

1. S. P. Sander, J. R. Barker, D. M. Golden, M. J. Kurylo, P. H. Wine, J. P. D. Abbatt, J. B. Burkholder, C. E. Kolb, G. K. Moortgat, R. E. Huie and V. L. Orkin, *JPL Publ.*, 2011, **10–6**.
2. M. C. Smith, W.-L. Ting, C.-H. Chang, K. Takahashi, K. A. Kristie A. Boering and J. J. Lin, *J. Chem. Phys.*, 2014, **141**, 074302.
3. B.-M. Cheng, M. Bahou, Y.-P. Lee and L. C. Lee, *J. Geophys. Res. Space Physics.*, 2002, **107** (A8), SIA 7-1–SIA 7-5.
4. L.-C. Lin, W. Chao, C. -H. Chang, K. Takahashi and J. J. Lin, *Phys. Chem. Chem. Phys.*, 2016, **18**, 28189–28197.
5. Y.-H. Lin, K. Takahashi and J. J. Lin, *J. Phys. Chem. Lett.*, 2018, **9**, 184–188.
6. D. L. Osborn, and C. A. Taatjes, *Int. Rev. Phys. Chem.*, 2015, **34:3**, 309–360
7. A. M. Green, V. P. Barber, Y. Fang, S. J. Klippenstein and M. I. Lester, *Proc. Natl. Acad. Sci. U. S. A.*, 2017, **114**, 12372–12377.
8. M. C. Smith, W. Chao, K. Takahashi, K. A. Boering, and J. J. Lin, *J. Phys. Chem. A*, 2016, **120**, 4789–4798.
9. R. Renaud, and L. C. Leitch, *Can. J. Chem.*, 1954, **32**, 545
